# 1                    **Coronavirus endoribonuclease nsp15 induces host cellular protein** 2                    **synthesis shutoff**

3                    **Short title: CoV nsp15 induces cellular protein synthesis shutoff**

4  
5    Xiaoqian Gong<sup>1,2#</sup>, Shanhuan Feng<sup>1#</sup>, Bo Gao<sup>1</sup>, Shouguo Fang<sup>3</sup>, Wenlian Weng<sup>1</sup>, Wenxiang  
6    Xue<sup>1</sup>, Hongyan Chu<sup>1</sup>, Yanmei Yuan<sup>1</sup>, Yuqiang Cheng<sup>4</sup>, Yingjie Sun<sup>1</sup>, Lei Tan<sup>1</sup>, Cuiping Song<sup>1</sup>,  
7    Xusheng Qiu<sup>1</sup>, Chan Ding<sup>1,5</sup>, Min Liao<sup>7</sup>, Edwin Tijhaar<sup>2</sup>, Maria Forlenza<sup>2, 6\*</sup>, Ying Liao<sup>1\*</sup>

8                    1.        Department of Avian Diseases, Shanghai Veterinary Research Institute, Chinese  
9    Academy of Agricultural Sciences, Shanghai, China.

10                    2.        Cell Biology and Immunology Group, Wageningen University and Research,  
11    Department of Animal Sciences, the Netherlands.

12                    3.        College of Agriculture, College of Animal Sciences, Yangtze University,  
13    Jingzhou, China.

14                    4.        Shanghai Key Laboratory of Veterinary Biotechnology, Key Laboratory of  
15    Urban Agriculture (South), School of Agriculture and Biology, Shanghai Jiao Tong University,  
16    Shanghai, China.

17                    5.        Jiangsu Co-innovation Center for Prevention and Control of Important Animal  
18    Infectious Diseases and Zoonoses, Yangzhou University, China.

19                    6.        Host-Microbe Interactomics Group, Wageningen University and Research,  
20    Department of Animal Sciences, the Netherlands.

21                    7.        Key Laboratory of Animal Virology of Ministry of Agriculture, Zhejiang  
22    University, Hangzhou, China.

23  
24                    #: Contributed to the work equally as the first author

25                    \*: Corresponding authors

26

## 27 **Abstract:**

28 The endoribonuclease (EndoU) nsp15 of coronaviruses plays an important role in evasion of  
29 host innate immune responses by reducing the abundance of viral double-stranded RNA,  
30 whereas less is known about potential host cellular targets of nsp15. In this study, we show that  
31 cellular protein synthesis is inhibited upon over-expression of nsp15 from four genera of  
32 coronaviruses and this is accompanied by nuclear retention of the poly(A) binding protein  
33 cytoplasmic 1 (PABPC1). We also show that the EndoU activity of nsp15 is indispensable for  
34 both, inhibition of protein synthesis and PABPC1 nuclear relocation. FISH analysis using oligo-  
35 dT probes, revealed an overlap between the localization of cellular mRNA and that of  
36 overexpressed nsp15 in some cells, suggesting that, when expressed alone, nsp15 may target  
37 host mRNA. When investigating the association of nsp15 on protein shut off in the context of  
38 a viral infection, we observed that the  $\gamma$ -coronavirus infectious bronchitis virus (IBV), induced  
39 host translation shutoff in an p-eIF2 $\alpha$ -independent manner and mainly retained PABPC1 in the  
40 cytoplasm, whereas the nsp15 EndoU-deficient IBV accumulated viral dsRNA and caused p-  
41 PKR-p-eIF2 $\alpha$ -dependent host protein translation shutoff, accompanied with PABPC1 nuclear  
42 relocation or stress granule (SG) localization. This phenomenon suggests that during infection  
43 with wild type IBV, although the cellular translation is inhibited, initiation of viral mRNA  
44 translation leads to PABPC1 binding to viral mRNA, thereby preventing its nuclear entry;  
45 during infection with nsp15 EndoU-deficient IBV however, the eIF2 $\alpha$ -dependent host protein  
46 translation shutoff prevents both host and viral mRNA translation initiation, releasing PABPC1  
47 from binding to cytosolic and viral mRNA, thereby relocating it to the nucleus or to SG.  
48 Altogether, this study reveals unique yet conserved mechanisms of host protein shutoff that add  
49 to our understanding of how coronaviruses regulate host protein expression through a  
50 mechanism that involves catalytically active nsp15 EndoU, and describes how nsp15 may target  
51 both, viral and host mRNA.

## 52 **Author summary**

53 It has been reported that coronavirus infection suppresses host protein translation,  $\alpha$ - and  
54  $\beta$ - coronavirus nsp1 is responsible for inhibition of host gene expression. However, for  $\gamma$ - and  
55  $\delta$ -coronavirus, there is no nsp1 and the underlying mechanisms by which virus regulates host  
56 translation are not well characterized. Here, we show that coronavirus endoribonuclease nsp15  
57 is responsible for the inhibition of host translation by targeting to host factors, meanwhile it  
58 helps virus bypass the PKR-eIF2 $\alpha$  mediated host translation shutoff, which is harmful for virus  
59 gene expression, by reducing the accumulation of viral dsRNA. This novel finding gives insight  
60 how does nsp15 targets to both host factors and viral RNA, to facilitate virus replication.  
61 Moreover, the novel function of nsp15 is found to be conserved among coronaviruses, revealing  
62 the essential role of this endoribonuclease in hijacking host translation machinery for virus  
63 replication.

## 64 **Introduction**

65           Coronaviruses are classified into four genera,  $\alpha$ ,  $\beta$ ,  $\gamma$  and  $\delta$ . They are enveloped, positive-  
66   sense, single-stranded RNA viruses possessing the largest known RNA genome (approximately  
67   25 to 32 kilobases) [1]. Over two-thirds of the genome at the 5'-end comprises the open reading  
68   frames ORF1a and ORF1b; the translation of ORF1b requires a programmed -1 ribosomal  
69   frameshifting mechanism [2]. Upon entry into host cells, coronavirus genome serves as the  
70   template for the translation of polyproteins 1a and 1ab, which are cleaved by internal papain-  
71   like protease (nsp3) and 3C-like protease (nsp5), to produce non-structural proteins (nsp) [3].  
72   The  $\alpha$  and  $\beta$  coronaviruses encode 16 nsps (nsp1 to nsp16) [4]; while the  $\gamma$  and  $\delta$  coronaviruses  
73   only encode 15 nsps (nsp2-nsp16) and lack the most N-terminal cleavage product nsp1 [5, 6].  
74   A number of nsps contain domains involved in transcription and replication of viral RNA,  
75   including the RNA-dependent RNA polymerase (RdRp) nsp12, the template-primer providers  
76   nsp7 and nsp8, the RNA helicase/5'-triphosphatase nsp13, the exoribonuclease nsp14, the  
77   endoribonuclease (EndoU) nsp15, and the RNA-cap methyltransferase nsp14 and nsp16 [7-13].  
78   Amongst them, RdRp nsp12 plays a central role to drive the replication and transcription of  
79   viral RNA, while the other nsps play a supportive role.

80           It has been reported that the highly conserved EndoU nsp15 is an integral component of  
81   the replication and transcription complex (RTC) [14-16], where it possesses uridylate-specific  
82   endonucleolytic activity on viral RNA. The RTC is accommodated in virus-induced double  
83   membrane vesicles (DMV) during SARS-CoV-2, SARS-CoV, MERS-CoV or MHV infection  
84   [17-21], or in zippered ER and spherules single membranes during IBV infection [22], which  
85   is formed by the transmembrane protein nsp3, nsp4, and nsp6 [23, 24]. The viral ligand double  
86   stranded (ds)RNA, an intermediate product of viral replication, is as well present in the virus-  
87   induced remodelled intracellular membrane structures [19, 25]. Nsp15 activity contributes to  
88   keeping the amount of dsRNA low to evade the detection by host cell sensors. Such role for  
89   nsp15 has been reported for MHV, HCoV-229E, PEDV, IBV [26-29], and likely also for SARS-  
90   CoV-2 [30, 31]. While the role of nsp15 in innate immune escape is well established, its effect  
91   on host cells remains poorly understood. In our previous study, we observed that nsp15  
92   suppresses the chemically- or physically-induced formation of stress granules (SG), and  
93   promotes nuclear accumulation of the cytoplasmic poly(A) binding protein (PABPC1) [29].  
94   This observation suggests that nsp15 not only targets viral RNA, but also regulates the host  
95   functions by targeting some unknown host substrates.

96           In order to successfully replicate, coronaviruses employ a range of strategies to escape or  
97   antagonize the host immune responses [32]. Inhibition of host gene expression is not only an  
98   alternative strategy to antagonize the host innate immune response by reducing the synthesis

99 anti-viral proteins, but also a smart way to hijack the host translation machinery to facilitate the  
100 translation of viral mRNA instead. The process of eukaryotic gene expression includes  
101 transcription, RNA processing, nuclear export of RNA, protein translation, and post-  
102 translational modification [33]. Viruses may suppress the host gene expression by reducing the  
103 levels of host mRNA or preventing their association with ribosomes or translation initiation  
104 factors. For example, poliovirus 3C protease inhibits RNA polymerase II mediated transcription  
105 initiation by cleavage of transcription activator Oct-1 [34, 35]; influenza A virus (IAV)  
106 polymerase acidic (PA) protein snatches the capped primers from nascent host transcripts for  
107 the synthesis of viral mRNA [36]; IAV NS1 inhibits polyadenylation of cellular precursor  
108 mRNA (pre-mRNA) and prevents the nuclear export of cellular mRNA [37-39]; human  
109 immunodeficiency virus (HIV) viral protein R (VPR) inhibits the splicing of host pre-mRNA  
110 [40]; herpes simplex virus (HSV) infected cell protein 27 (ICP27) blocks host transcription  
111 termination [41]; poliovirus 2A protease affects cellular mRNA nuclear export by mediating  
112 nucleoporin cleavage [42]; poliovirus 3C proteinase cleaves PABP to inhibit translation  
113 initiation [43]. It has been reported that several  $\alpha$ - and  $\beta$ -coronaviruses, through their nsp1,  
114 hijack the host translation machinery by repressing host mRNA transcription in the nucleus [44]  
115 , preventing the nuclear export of host mRNA [45, 46], degrading host mRNA in the nucleus  
116 and cytoplasm [44, 47-50], and inhibiting host mRNA translation by interfering ribosome [49,  
117 51, 52]. However, for the  $\gamma$ -coronavirus IBV and  $\delta$ -coronavirus PDCoV, which lack nsp1,  
118 although host protein translation shutoff is also observed, the protein(s) potentially involved in  
119 are not well characterized [53-55], although the IBV 5b and S were identified to be associated  
120 with translation inhibition [56, 57].

121 Several viral endonucleases play a role in regulating not only viral RNA but also host gene  
122 expression by targeting host mRNA for degradation. For example, the  *$\alpha$ -herpesvirinae* herpes  
123 simplex virus (HSV) virion host shutoff (Vhs) protein [58-60], the  *$\gamma$ -herpesvirinae* Kaposi's  
124 sarcoma-associated herpesvirus (KSHV) shutoff and exonuclease (SOX protein) [61-63],  
125 Epstein Barr virus (EBV) BGLF5 protein [64-66], and murine herpesvirus 68 (MHV-68)  
126 muSOX protein [61, 67], possess endonuclease activity and inhibit synthesis of cellular proteins  
127 by promoting the global mRNAs degradation [61, 63, 68, 69]. As mentioned, the IAV cap-  
128 dependent endonuclease PA is associated with the RNA polymerase complex and is responsible  
129 for snatching capped oligonucleotides from cellular pre-mRNAs and for using them as primers  
130 for the synthesis of viral mRNAs, thereby helping viral gene expression while suppressing host  
131 mRNA maturation [36, 70, 71]; moreover, IAV encodes another endonuclease, PA-X, that

132 selectively degrades host RNAs and usurps the host mRNA processing machinery to destroy  
133 nascent mRNAs and limit host gene expression [72-74].

134 Here we investigated the ability of EndoU nsp15 of IBV and of other coronaviruses to  
135 inhibit cellular protein synthesis. We provide evidences that nsp15 inhibits host protein  
136 translation through a mechanism that involves targeting host factors involved in the translation  
137 complex, including host mRNA and PABPC1; a mechanism for which the EndoU activity is  
138 indispensable. In the context of IBV infection, nsp15, probably in concert with other IBV  
139 proteins, trigger an eIF2 $\alpha$ -independent host translation shutoff. When nsp15 EndoU activity is  
140 deficient, a higher amount of viral dsRNA accumulates in the cells [29], the nsp15 deficient  
141 IBV inhibits host protein translation through a PKR-eIF2 $\alpha$ -dependent mechanism. Altogether,  
142 our findings unveil new, yet conserved strategies shared among coronaviruses, to regulate host  
143 gene and protein expression and the role of the EndoU nsp15 therein.

## 144 **Results**

### 145 **IBV nsp15 inhibits exogenous protein synthesis but does not affect mRNA levels**

146 We previously reported that IBV nsp15 interferes with the chemically- and physically-induced  
147 SGs formation, possibly by targeting the host translation machinery [29]. Furthermore, during  
148 a screening of IBV-encoded type I IFN antagonists using a luciferase reporter system, we  
149 observed that IBV nsp15 reduced the expression not only of the IFN $\beta$  promotor-driven  
150 luciferase, but also the expression of the co-transfected plasmids encoding HA-tagged MAVS  
151 (HA-huMAVS) in 293T cells (**supplementary Fig 1**). These data prompted us to hypothesize  
152 that IBV nsp15 interferes with the host translation system. It was noted that 5a and E also  
153 suppressed the co-transfected huMAVS expression, meanwhile reduced the expression of  
154 IFN $\beta$ -driven luciferase. This result indicates IBV encodes several proteins involved in  
155 inhibition of protein expression.

156 To examine whether IBV nsp15 indeed interferes with the host protein synthesis, DF-1  
157 cells were co-transfected with plasmids encoding Flag-tagged IBV nsp15 and V5-tagged  
158 constitutively active form (N-terminal domain) of chicken MDA5 [V5-chMDA5(N)] [75],  
159 nsp15 and HA-chMAVS [76], nsp15 and V5-tagged chicken interferon regulatory factor 7 (V5-  
160 chIRF7) [77], or nsp15 and enhanced green fluorescent protein (EGFP). Vector PXJ40, Flag-  
161 tagged nsp7, nsp8, nsp9, and nsp13 were co-transfected with corresponding plasmids as control.  
162 Western blot analysis showed that overexpression of nsp15 strongly suppressed the protein  
163 levels of V5-chMDA5(N), HA-chMAVS, V5-chIRF7, and also EGFP to various degrees (**Fig**  
164 **1A**), whereas overexpression of nsp7, nsp8, nsp9, nsp12, or transfection of PXJ40 did not.

165 These results confirm that nsp15 inhibits the expression of exogenous proteins encoded by co-  
166 transfected plasmids.

167 Considering the EndoU activity, we next asked whether the effects of IBV nsp15 on  
168 exogenous protein expression were mediated by reducing mRNA levels. To this end, we  
169 quantified the transcripts derived from the co-transfected plasmids encoding V5-chMDA5(N)  
170 or HA-chMAVS. To prevent amplification of endogenous transcripts, primers were designed  
171 to span the V5 or HA tag sequence. Using random primers for an unbiased cDNA synthesis,  
172 the quantitative RT-PCR analysis showed that nsp15 did not affect mRNA levels of transcripts  
173 derived from co-transfected chMDA5(N) or chMAVS (**Fig 1B**). These data are also consistent  
174 with our previous report showing that during IBV infection no effect on host mRNA stability  
175 was observed [53].

176 Since the nsp15 induced inhibition of exogenous protein expression was not restricted  
177 to proteins involved in anti-viral responses but was also observed for EGFP, we next asked  
178 whether the effect on protein synthesis is universal to host endogenous proteins. To test this,  
179 we determined the signal of puromycin-labelled, *de novo* synthesized, endogenous peptides.  
180 Puromycin is an analogue of tRNA that binds to growing peptide chains and causes the release  
181 of premature peptide chains [78]. Therefore, the signal of puromycin-labelled peptides, detected  
182 with an anti-puromycin antibody, represents the number of peptides *de novo* synthesized during  
183 the period of puromycin treatment. In all nsp15-expressing cells, puromycin labelling signal  
184 was strongly reduced, while this was not observed in nsp15 non-expressing cells, or cells  
185 transfected with the control PXJ40, indicating that nsp15 indeed suppresses *de novo* protein  
186 synthesis (**Fig 1C**). Together, these results show that overexpression of nsp15 inhibits the global  
187 synthesis of endogenous proteins.

188

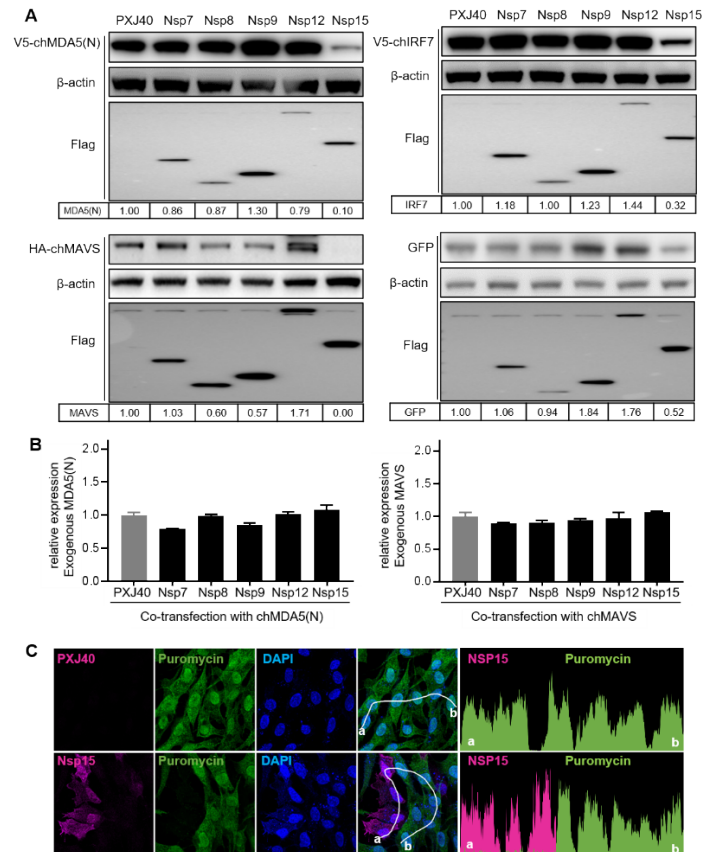

189  
 190 **Fig. 1 IBV nsp15 inhibits *de novo* protein synthesis but does not affect mRNA levels.** (A)  
 191 DF-1 cells were co-transfected with plasmids encoding Flag-tagged IBV nsp7, nsp8, nsp9,  
 192 nsp12 or nsp15 and the plasmids encoding a constitutively active form of V5-chMDA5(N), or  
 193 HA-chMAVS, or V5-chIRF7, or enhanced green fluorescent protein (EGFP). The empty PXJ40  
 194 vector was included as a control. After 24 h, cells were collected for western blot analysis.  
 195 Protein signals were detected using the indicated antibodies, and  $\beta$ -actin was detected as loading  
 196 control. The density of the protein bands was analysed with ImageJ, normalized by the density  
 197 of  $\beta$ -actin, and the ratio was presented relative to the density detected in the corresponding  
 198 PXJ40 sample. (B) PXJ40, or Flag-tagged IBV nsp7, nsp8, nsp9, nsp12 or nsp15 were co-  
 199 transfected into DF-1 cells with V5-chMDA5(N) or HA-chMAVS. After 24 h, cells were  
 200 collected and the RNA were extracted, subjected to quantitative RT-PCR, using primers  
 201 spanning the tag (V5 or HA) sequence and the chMDA5(N) or chMAVS sequence. mRNA  
 202 levels of V5-chMDA5(N) or HA-chMAVS were normalized relative to the  $\beta$ -actin  
 203 housekeeping gene and presented relative to PXJ40 group. Values present results of one  
 204 representative experiment, which was performed three times with comparable results. Error  
 205 bars indicate standard deviation of triplicate values within one experiment. (C) DF-1 cells were  
 206 transfected with plasmid encoding Flag-nsp15 or PXJ40 for 23 h and treated with puromycin  
 207 (5  $\mu$ g/ml) for 1 h to label *de novo* synthesized peptides. Indirect immunofluorescence was  
 208 performed to detect nsp15 (magenta), puromycin (green), and nuclei (DAPI, blue).  
 209 Fluorescence intensity of nsp15 and puromycin in individual cells along the white line (from a  
 210 to b) is shown in the right panel (histogram plot).

211  
 212  
 213

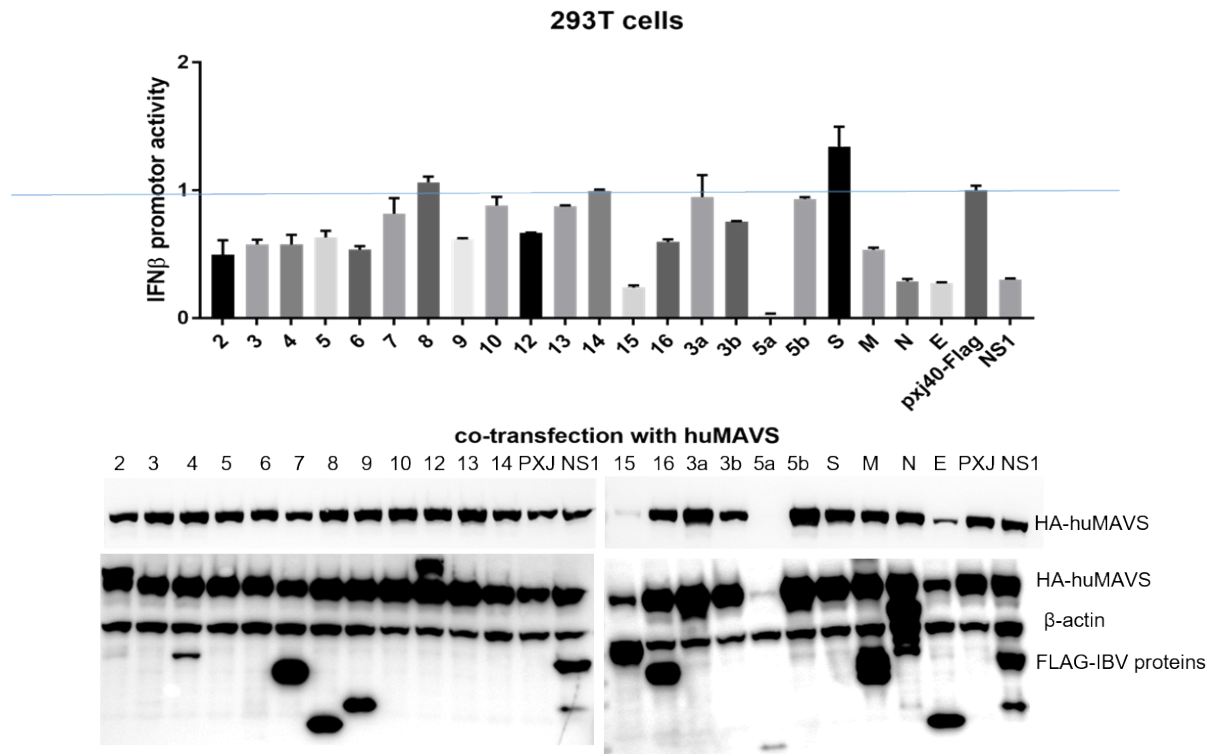

214  
215

216 **Supplementary Fig 1. IBV nsp15 downregulates MAVS-mediated IFN $\beta$  induction and the**  
217 **expression of co-transfected plasmid.** 293T cells were seeded in 48 well plates at  $3 \times 10^4$   
218 cells/well (for luciferase assay) or 12 well plates at a density of  $10^5$  cells/well (for Western blot).  
219 Cells were co-transfected with Flag-tagged IBV proteins (nsp2, nsp3, nsp4, nsp5, nsp6, nsp7,  
220 nsp8, nsp9, nsp10, nsp12, nsp13, nsp14, nsp15, nsp16, 3a, 3b, 5a, 5b, S, M, N, E) together with  
221 HA-huMAVS, the reporter plasmid encoding firefly luciferase driven by the inducible IFN $\beta$   
222 promoter, and the control plasmid pRL-TK encoding Renilla luciferase driven by the  
223 constitutive HSV TK promoter. The PXJ40-Flag and IAV Flag-tagged NS1 were included in  
224 parallel experiment control. After 24 h, cells in 48 well plates were lysed, the firefly and Renilla  
225 luciferase activities were measured. The IFN $\beta$  promoter activity was normalized to Renilla and  
226 presented relative to the PXJ40-Flag control. Bars indicated the average of two co-transfection  
227 experiments performed independently. Cells in 12 well plates were lysed and subjected to  
228 Western blot to verify the protein expression. The membranes were first probed with an anti-  
229 HA antibody to detect huMAVS, followed by re-probing with an anti-Flag antibody to detect  
230 IBV proteins and IAV NS1, and then probed with an anti-actin antibody to detect actin as  
231 loading control.

232

233 **The catalytic activity and oligomeric structure of IBV nsp15 are indispensable for**  
234 **inhibition of *de novo* protein synthesis**

235

236

The two conserved catalytic residues for IBV nsp15's EndoU activity reside at histidine  
residues H223 and H238, and the two residues critical for oligomerization resides at aspartic



237 acid D285 and D315. We previously reported that also for IBV, the EndoU activity of nsp15 is  
238 required to limit the accumulation of dsRNA intermediates in the cells, thereby escaping host  
239 recognition and delaying IFN $\beta$  production [29]. To investigate whether the EndoU activity is  
240 required also for the observed effects on *de novo* protein synthesis inhibition, we made use of  
241 previously generated mutated nsp15 in which either one of the catalytic histidine (H) or one of  
242 the aspartic acid (D) residues, were substituted by an alanine (A) residue (H223A, H238A,  
243 D285A, D315A) [29]. Western blot analysis revealed that mutating the catalytic or the  
244 oligomerization core residues largely abolished the inhibiting effect of nsp15 on exogenous  
245 protein expression [chMDA5(N), chMAVS, chIRF7, EGFP] (**Fig 2A**), suggesting that the  
246 EndoU activity and oligomerization of nsp15 are indeed indispensable for its inhibition on  
247 protein synthesis. In addition, the expression level of wild type nsp15 was lower than the levels  
248 of mutated nsp15 (**Fig 2A**), suggesting that the effect on cellular protein synthesis also affected  
249 the expression of nsp15 itself. These data confirm that the inhibitory effect of nsp15 on the  
250 cellular protein synthesis requires its EndoU activity and oligomeric structure. The expression  
251 levels of the oligomerization-deficient nsp15 (D285A, D315A) were lower than those of the  
252 catalytic-deficient nsp15, suggesting that the inability to oligomerize may affect protein  
253 stability. Although far less profound than observed for wild type nsp15, the H238A mutation  
254 also resulted in a somewhat lower expression of co-transfected chIRF7, and the H238A, D285A  
255 and D315A mutations resulted in a lower expression of co-transfected EGFP (**Fig 2A**),  
256 suggesting that inactivation of single catalytic/oligomerization domain might not be sufficient  
257 to completely abolish the effect of nsp15 on protein expression.

258 We then examined the effect of wild type and mutated nsp15 on endogenous *de novo*  
259 protein synthesis by analysing the fluorescence intensity of the puromycin-labelled peptides  
260 signals. Indirect immunofluorescence analysis in DF-1 cells showed that, compared to the cells  
261 not expressing nsp15, wild type nsp15 expressing cells displayed a strongly reduced puromycin  
262 signal ; however, this was not observed in cells expressing mutated nsp15 (**Fig 2B**),  
263 demonstrating that EndoU activity and oligomerization structure are indeed indispensable for  
264 the inhibiting effect on cellular protein synthesis. We further assessed the inhibiting effect of  
265 nsp15 on cellular protein synthesis in Vero cells and H1299 cells, which are permissive cell  
266 lines for the IBV-Beaudette strain. Consistent with the results in DF-1 cells, indirect  
267 immunofluorescence analysis showed that the presence of wild type nsp15, but not of catalytic-  
268 deficient H223A nsp15, led to lower puromycin labelling signal in Vero and H1299 cells (**Fig**  
269 **2C**). Altogether, these results demonstrate that the inhibiting effect on exogenous and

270 endogenous protein synthesis by IBV nsp15 is a generalized inhibitory effect on cellular protein  
 271 synthesis, and not restricted to cell types.

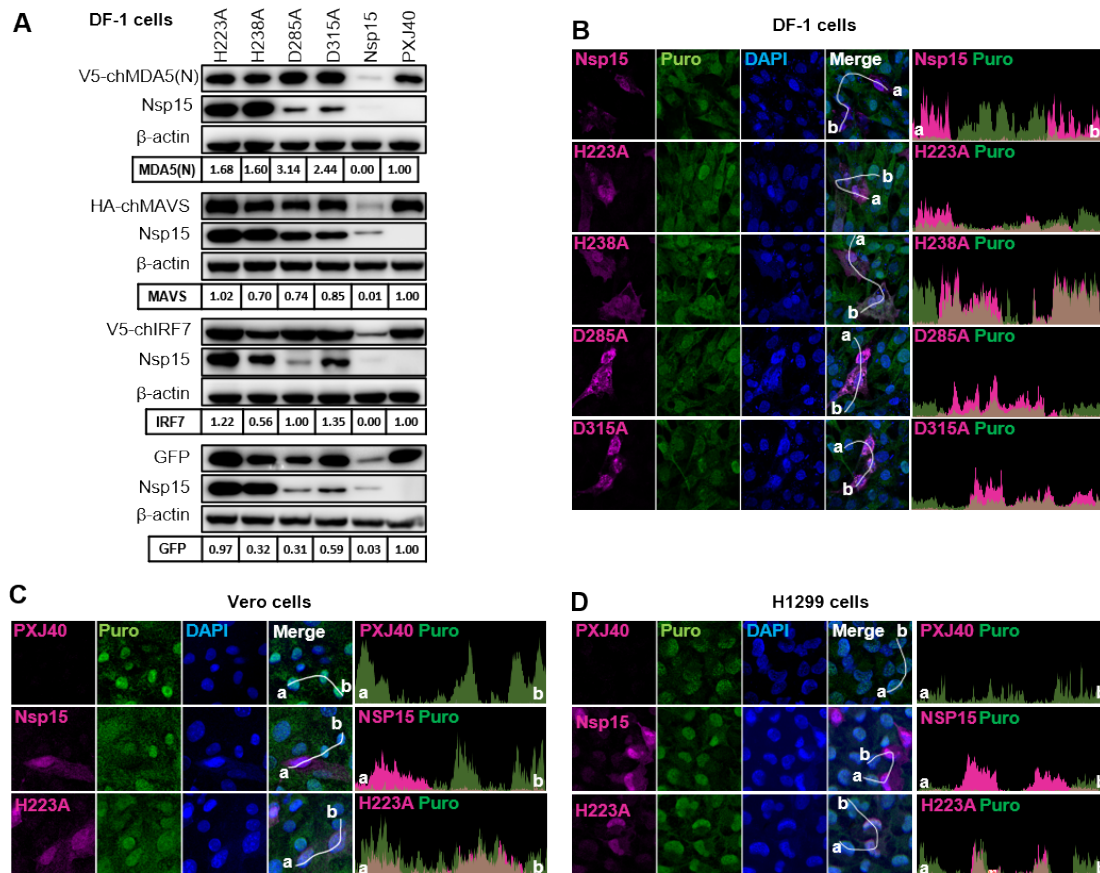

272  
 273 **Fig 2. The catalytic activity and oligomeric structure of IBV nsp15 are indispensable for**  
 274 **the inhibition of *de novo* protein synthesis in chicken cells as well as mammalian cells. (A)**  
 275 Plasmid encoding Flag-tagged catalytic-deficient nsp15 H223A, H238A, oligomerization-  
 276 deficient nsp15 D285A, D315A, wild type nsp15, and the vector PXJ40, were each co-  
 277 transfected with plasmids encoding V5-chMDA5(N), HA-chMAVS, V5-IRF7, or EGFP into  
 278 DF-1 cells. After 24 h, Western blot analysis was performed using corresponding antibodies.  
 279 β-actin was detected as loading control. Density of the bands was analysed by Image J,  
 280 normalized to the signal of β-actin, and the ratio was presented relative to the density detected  
 281 in the corresponding PXJ40 transfected cells. (B) DF-1 (C) Vero and H1299 cells, were  
 282 transfected with the plasmid encoding wild type or mutated nsp15 and treated with puromycin  
 283 (5 μg/ml) for 1 h at 23 h post-transfection (h.p.t), to label the *de novo* synthesized peptides.  
 284 Indirect immunofluorescence was performed to detect nsp15 (magenta), puromycin (green),  
 285 and nuclei (DAPI, blue). Fluorescence intensity of nsp15 and puromycin signal along the white  
 286 line (from a to b) is indicated in the right panel (histogram plot).

287

288 **Inhibition of *de novo* protein synthesis is a conserved feature of nsp15 from different**  
 289 **genera of coronaviruses**

290 We previously reported on the conserved activity of catalytic histidine residues of nsp15 on  
 291 inhibition of SG formation, including nsp15 from IBV, PEDV, TGEV, PDCoV, SARS-CoV-1,  
 292 MERS-CoVs, and SARS-CoV-2 [29]. This prompted us to investigate whether the observed  
 293 inhibitory effect of IBV nsp15 on protein synthesis is conserved among nsp15 from different  
 294 genera of coronaviruses and whether such function is dependent on the EndoU catalytic activity.  
 295 For this purpose, the expression plasmids for wild type and catalytic-deficient nsp15 from the  
 296 above-mentioned coronaviruses were co-transfected with a plasmid encoding EGFP or IBV N  
 297 in Vero cells. Western blot analysis revealed that wild type nsp15 of PEDV, TGEV, PDCoV  
 298 and SARS-CoV-1 reduced the expression EGFP and IBV N, while catalytic-deficient nsp15  
 299 did not (**Fig 3A-D**). Conversely, nsp15 of MERS-CoV and SARS-CoV-2 did not show a  
 300 pronounced effect on EGFP or IBV N expression (**Fig 3E-F**). These data suggest that,  
 301 consistently with the data for IBV nsp15 (**Fig 1**), also nsp15 from most of the tested  
 302 coronaviruses can suppress exogenous protein expression.

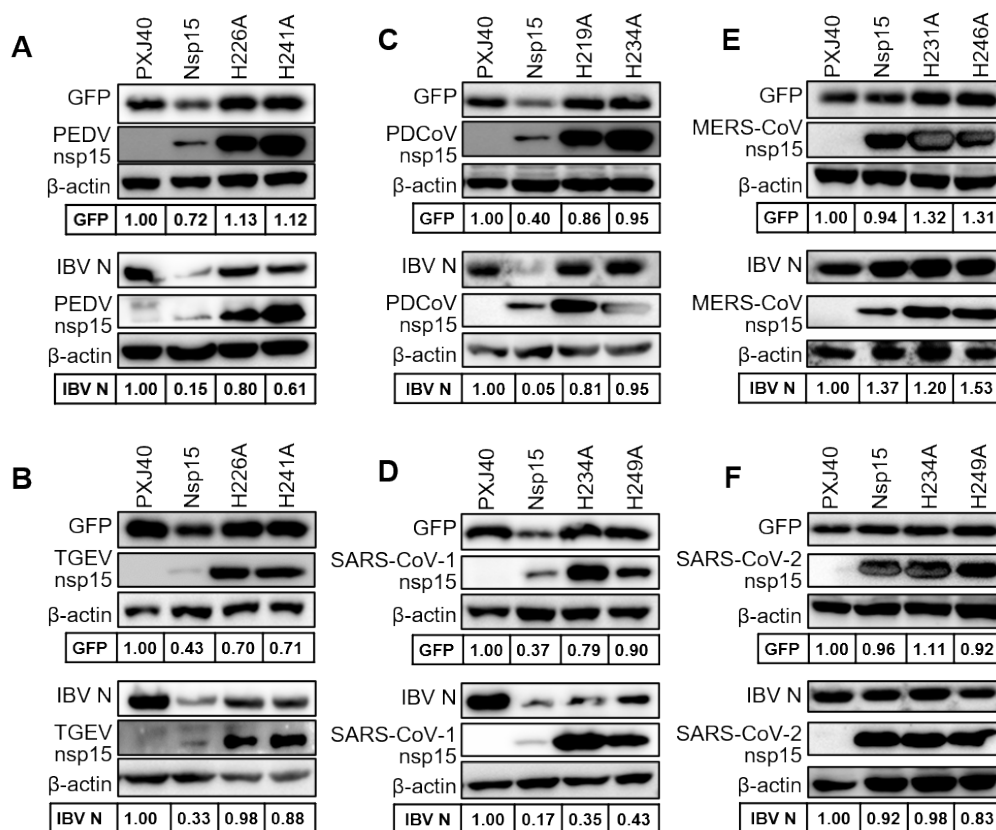

303  
 304 **Fig 3. Nsp15 from most of coronaviruses inhibits expression of exogenous transfected**  
 305 **plasmids.** The plasmid encoding wild type or catalytic-deficient nsp15 from the indicated  
 306 coronaviruses was co-transfected with the plasmid encoding EGFP or IBV N into Vero cells.  
 307 After 24 h, Western blot analysis was performed using corresponding antibodies.  $\beta$ -actin was  
 308 detected as loading control. Density of the bands of EGFP or IBV N were analysed by Image  
 309 J, normalized to the signal of  $\beta$ -actin and presented relative to the PXJ40 group.

310 Next, we investigated whether nsp15 from different genera of coronaviruses also  
311 suppress endogenous protein expression. Consistent with the result on IBV nsp15 (**Fig 2B-D**),  
312 indirect immunofluorescence analysis revealed that PK15 cells expressing wild type nsp15 of  
313 PEDV, TGEV, PDCoV and HeLa cells expressing wild type nsp15 of SARS-CoV-1 displayed  
314 weaker puromycin labelling signals than cells not expressing nsp15 (**Fig 4**). This effect was  
315 largely abolished in catalytic-deficient nsp15 expressing cells (**Fig 4**). Consistent with the data  
316 in **Fig 3**, cells expressing nsp15 of MERS-CoV and nsp15 of SARS-CoV-2 also showed a  
317 reduction in puromycin signal compared to cells not expressing nsp15, but the effect was less  
318 pronounced than the reduction afforded by nsp15 from other coronaviruses, suggesting that  
319 nsp15 of MERS-CoV and SARS-CoV-2 might work somewhat differently from other  
320 coronaviruses nsp15. Similar effects of nsp15 on puromycin staining were observed when  
321 nsp15 of PEDV, TGEV, PDCoV were expressed in PK1, ST, and PK15 cells, respectively, and  
322 nsp15 of SARS-CoV-1, MERS-CoV and SARS-CoV-2 were expressed in Vero cells  
323 (**Supplementary Fig 2**), suggesting the inhibition of host protein translation by nsp15 is general  
324 and not restricted to specific cell types.

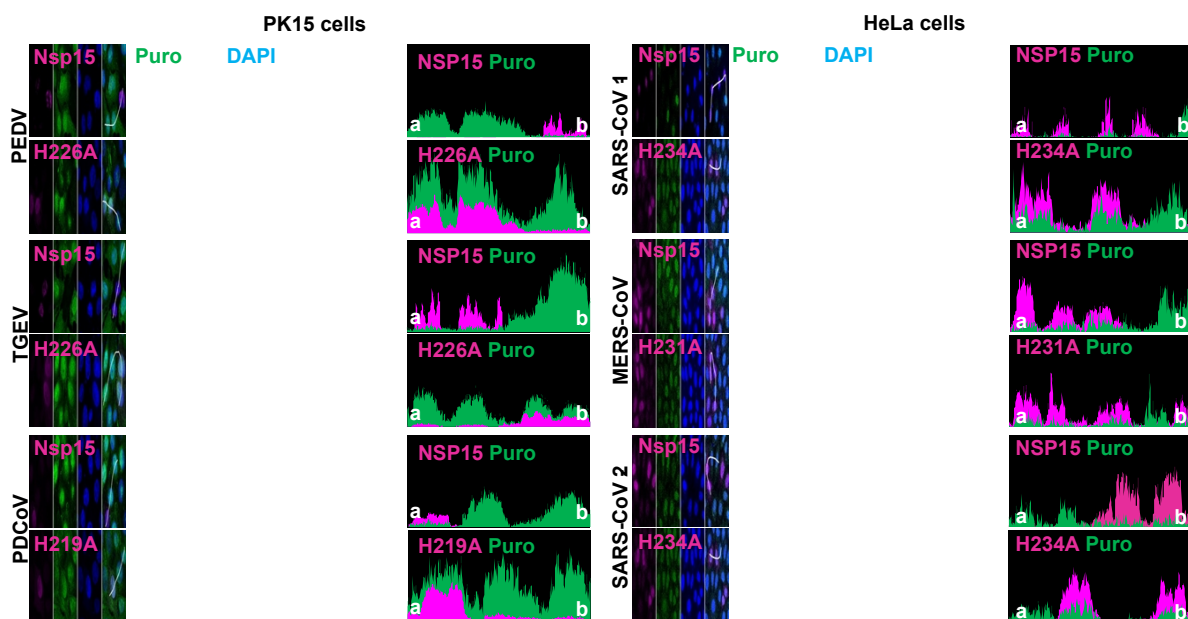

325  
326 **Fig 4. Nsp15 from different genera of coronavirus inhibits *de novo* protein synthesis.**  
327 Porcine kidney 15 (PK15) cells were transfected with wild type nsp15 or the corresponding  
328 catalytic-deficient nsp15 from porcine coronaviruses PEDV, TGEV or PDCoV, human HeLa  
329 cells were transfected with wild type nsp15 or the corresponding catalytic-deficient nsp15 from  
330 human coronaviruses SARS-CoV-1, MERS-CoV or SARS-CoV-2. At 23 h.p.t, cells were  
331 treated with puromycin (5 µg/ml) for 1 h. Indirect immunofluorescence was performed using  
332 anti-Flag to detect nsp15 (magenta), anti-puromycin to detect puromycin-labelled *de novo*  
333 synthesized peptides (green), and DAPI to visualize nuclei (blue). Fluorescence intensity of

334 nsp15 and puromycin signal along the white line (from a to b) is indicated in the right panel  
335 (histogram plot).

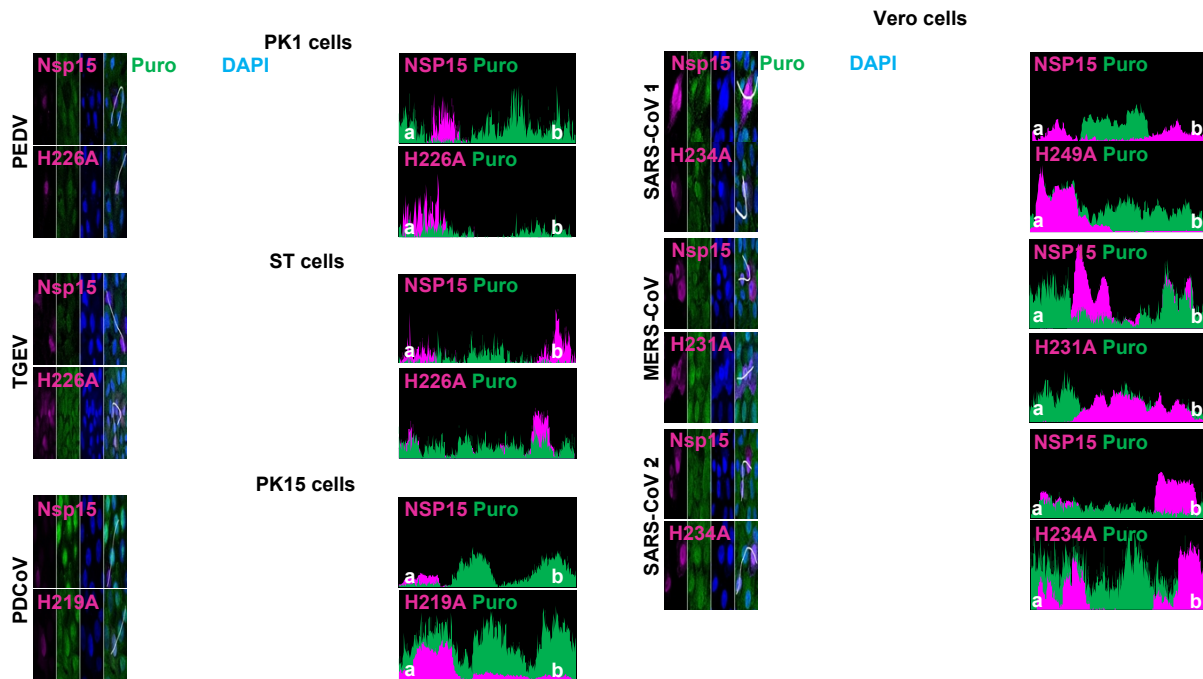

336  
337 **Supplementary Fig 2. Nsp15 from different genera of coronavirus inhibits *de novo* protein**  
338 **synthesis.** The porcine (PK1, ST and PK15) cells and Vero cells were transfected with wild  
339 type nsp15 or the corresponding catalytic-deficient nsp15 from the indicated coronaviruses. At  
340 23 h.p.t, cells were treated with puromycin (5  $\mu$ g/ml) for 1 h. Indirect immunofluorescence was  
341 performed using anti-Flag to detect nsp15 (magenta), anti-puromycin to detect puromycin-  
342 labelled *de novo* synthesized peptides (green), and DAPI to visualize nuclei (blue).  
343 Fluorescence intensity of nsp15 and puromycin signal along the white line (from a to b) is  
344 indicated in the right panel (histogram plot).

345  
346 **Nsp15 from different genera of coronavirus alters the subcellular distribution of PABPC1**  
347 **but does not significantly affect cellular mRNA localization**

348 Considering that IBV nsp15 alone has a profound effect on *de novo* protein synthesis (**Fig 1**  
349 **and Fig 2**) but that such effect is not mediated by direct degradation of mRNA (**Fig 1B**), we  
350 next investigated whether nsp15 may rather act on mRNA localization by for example  
351 preventing mRNA export from the nucleus to the cytoplasm leading to reduced synthesis of  
352 host proteins, as previously reported for Influenza virus NS1 protein [39]. mRNA shuttling is  
353 tightly regulated by RNA binding proteins such as PABPC1 [79-81]. We previously showed  
354 that under stress conditions [heat shock or sodium arsenite (ARS) treatment] the ability of nsp15  
355 to relocate PABPC1 into the nucleus is a conserved feature among different genera of  
356 coronaviruses [29], we now ask whether this is accompanied by changes in mRNA distribution.  
357 We used a cross-reacting PABPC1 antibody that allowed us to visualize the localization of  
358 PABPC1 in DF-1 cells as well as mammalian cells, concomitantly to the distribution of mRNA

359 by fluorescence *in situ* hybridization (FISH) using fluorescently labelled oligo (dT) probes.  
360 Consistent with our previous study, overexpression of IBV wild type nsp15, but not catalytic-  
361 deficient or oligomerization-deficient IBV nsp15, caused PABPC1 nuclear localization (yellow  
362 arrow) in some but not all nsp15-expressing DF-1 cells (**Fig 5A**), but this was not accompanied  
363 by accumulation of mRNA in the nucleus (red arrows), as otherwise observed in the positive  
364 control group treated with ARS (**Fig 5B**). The nuclear relocation of PABPC1 (yellow arrows)  
365 in nsp15-expressing cells was more obvious in Vero and H1299 cells than in DF-1 cells (**Fig**  
366 **5B-D**), and again no obvious nuclear retention of mRNA (red arrows) was observed (**Fig 5B-**  
367 **D**). Closer observation revealed that in some cells, despite the lack of correlation between  
368 PABPC1 (yellow arrows) and mRNA distribution (red arrows), an apparent overlap between  
369 nsp15 or nsp15-H223A (white arrows) and mRNA (red arrows) could be observed in DF-1,  
370 H1299, and Vero cells (**Fig 5B, 5D, supplementary Fig 3**), hinting at the possibility that nsp15  
371 may bind to host mRNA.

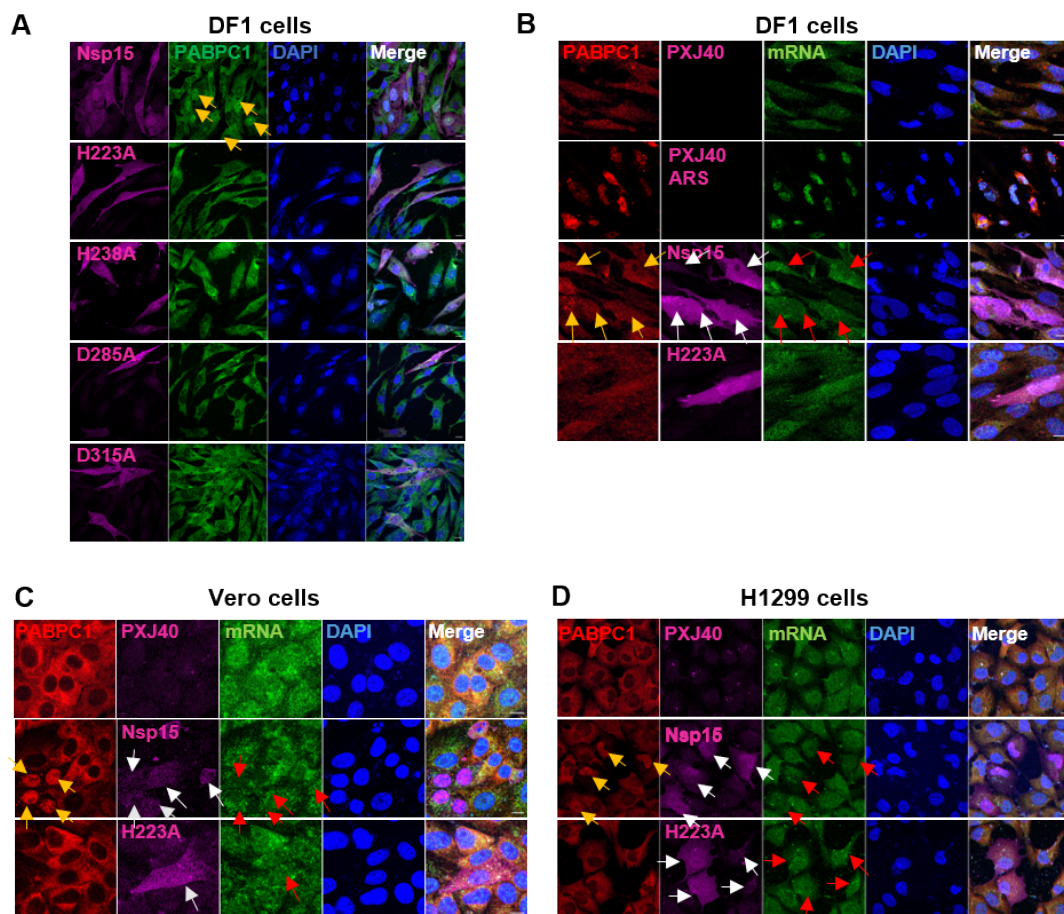

372

373 **Fig 5. IBV nsp15 alters the localization of PABPC1 but not that of cellular mRNA.** (A)  
374 Plasmids encoding wild type IBV nsp15 or the catalytic/oligomerization-deficient nsp15  
375 (H223A, H238A, D285A, D315A) were transfected into DF-1 cells. After 24 h, indirect  
376 immunofluorescence was performed to visualize nsp15 (magenta), PABPC1 (green), and

377 nucleus (blue). White arrows indicate cells that express wild type nsp15 and have nuclear  
378 accumulation of PABPC1. (B-C) DF-1, Vero, or H1299 cells were transfected with plasmids  
379 encoding IBV nsp15 or catalytic-deficient nsp15 H223A, or the empty PXJ40. After 24 h, *in*  
380 *situ* hybridization of mRNA was performed using oligo dT probes (green) followed by indirect  
381 immunofluorescence to detect IBV nsp15 (magenta) and PABPC1 (red). Nuclei were labelled  
382 by DAPI (blue). White arrows indicate the cells that express IBV nsp15, red arrows indicate  
383 the distribution of mRNA, yellow arrows indicate the cells with PABPC1 nuclear relocation.  
384 Treatment with 1 mM ARS for 30 min was used as positive control for stimulation of PABPC1  
385 and mRNA nuclear localization.

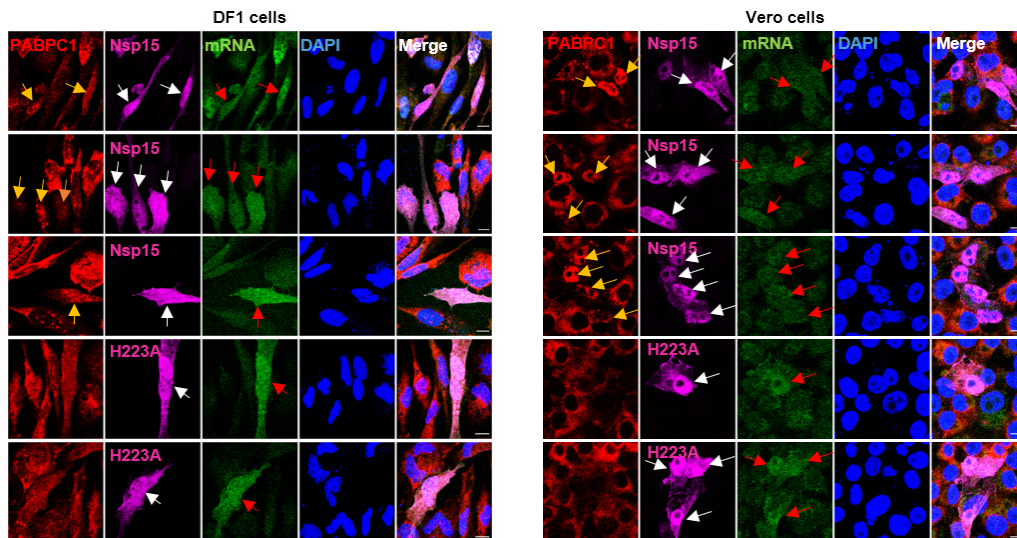

386  
387 **Supplementary Fig 3. Distribution of IBV nsp15 overlaps with that of mRNA.** Wild type  
388 IBV nsp15 or the catalytic/oligomerization-deficient nsp15 (H223A, H238A, D285A, D315A)  
389 was transfected into DF-1 or Vero cells. After 24 h, *in situ* hybridization followed by indirect  
390 immunofluorescence was performed to visualize PABPC1 (red), nsp15 (magenta), cellular  
391 mRNA (green) and nuclei (blue). Yellow arrows indicate cells that express wild type nsp15  
392 with nuclear accumulation of PABPC1. White arrows and red arrows indicate cells expressing  
393 either wild type or mutated nsp15 in which location of nsp15 strongly overlaps with that of  
394 mRNA.

395 After observing that the inhibitory effect on cellular protein synthesis is conserved  
396 among nsp15 from most coronaviruses (**Fig 3-4**), and that IBV nsp15 alters PABPC1  
397 localization to nucleus without apparent effects on cellular mRNA distribution (**Fig 5**), we next  
398 investigated whether nuclear localization of PABPC1 in cells expressing nsp15 of PEDV,  
399 TGEV, PDCoV, SARS-CoV-1, MERS-CoV, or SARS-CoV-2 (as previously reported [29]) is  
400 accompanied by changes in mRNA distribution. In agreement with previous observation [29],  
401 also in PK15 cells and Vero cells, ARS treatment led to redistribution and colocalization of  
402 PABPC1 and mRNA to ARS induced cytoplasmic SGs (**Fig 6**). Whereas, similar to what was  
403 observed for IBV nsp15, overexpression of wild type, but not of the catalytic-deficient nsp15

404 of PEDV, TGEV and PDCoV, caused nuclear accumulation of PABPC1 (indicated by yellow  
405 arrows) but not of mRNA (indicated by red arrows) (**Fig 6A**). Interestingly, the mRNA signal  
406 was clearly lower (magenta arrows) in PEDV, TGEV and PDCoV nsp15 expressing cells that  
407 displayed nuclear relocation of PABPC1 (yellow arrows) than in cells that did not show this  
408 nuclear relocation, suggesting degradation of cellular mRNA. In Vero cells, wild type but not  
409 catalytic-deficient nsp15 of SARS-CoV-1 led to nuclear localization of PABPC1 (yellow arrows)  
410 and this was not accompanied by a decrease or re-distribution of mRNA signal (red arrows)  
411 (**Fig 6B**). In line with the observed different effects of MERS-CoV and SARS-CoV-2 nsp15 on  
412 protein synthesis in **Fig 3, Fig 4, supplementary Fig 2**, only part of the cells expressing nsp15  
413 of MERS-CoV and SARS-CoV-2 showed an altered localization of PABPC1 (yellow arrows)  
414 (**Fig 6B**); PABPC1 remained in cytoplasm in some nsp15 expressing cells (blue arrows). Again,  
415 in most nsp15-expressing cells, co-localization between nsp15 and mRNA signal or between  
416 nsp15-H238A and mRNA was observed (red arrows) (**Fig 6B**), suggesting binding of nsp15 to  
417 mRNA.

418         Altogether these data suggest that subcellular redistribution to the nucleus of PABPC1  
419 can be triggered by nsp15 of different genera of coronaviruses, and that this is dependent on the  
420 catalytic activity of nsp15. Furthermore, the PEDV, TGEV, or PDCoV nsp15-associated  
421 nuclear localisation of PABPC1 is accompanied by a weaker mRNA signal, possibly suggesting  
422 depletion or degradation of host mRNA by nsp15. Conversely, SARS-CoV-1, MERS-CoV and  
423 SARS-CoV-2 nsp15-mediated nuclear relocation of PABPC1 is not accompanied by changes  
424 in host mRNA distribution. Finally, overlap between nsp15 and mRNA signal was observed in  
425 some cells, suggesting nsp15 might competitively binds to host mRNA which in turns triggers  
426 relocation of PABPC1 into the nucleus.

427



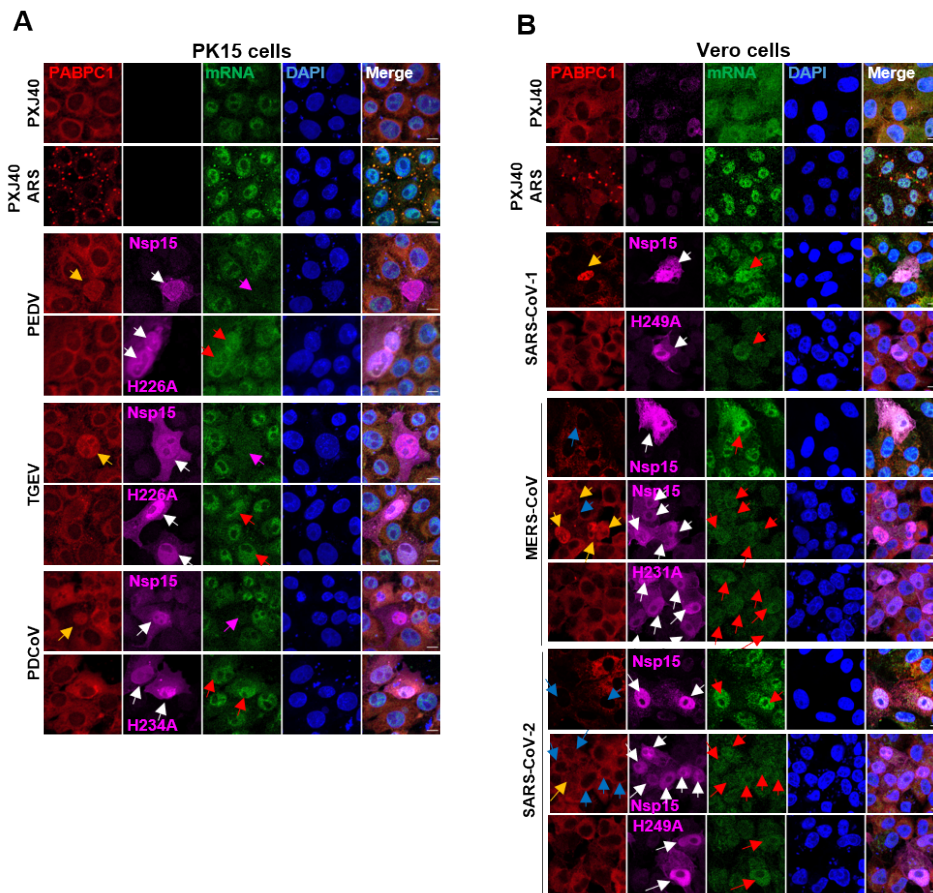

428

429 **Fig 6. Nsp15 of PEDV, TGEV, PDCoV and SARS-CoV-1 alters the localization of**  
 430 **PABPC1 but not that of cellular mRNA, nsp15 of MERS-CoV, SARS-CoV-2 does so in**  
 431 **most but not all cells.** Wild type nsp15 or catalytic-deficient nsp15 of the indicated  
 432 coronaviruses was transfected into the indicated cell line. After 24 h, indirect  
 433 immunofluorescence was performed to reveal the location of nsp15 (magenta), PABPC1 (green)  
 434 and nucleus (blue). White arrows indicate the cells expressing nsp15, yellow arrows indicate  
 435 the cells expressing nsp15 with a nuclear localization of PABPC1, blue arrows indicate the cells  
 436 expressing nsp15 without nuclear localization of PABPC1, magenta arrows indicate the nsp15  
 437 expressing cells with weaker mRNA signal, red arrows indicate cells with overlapping of nsp15  
 438 and mRNA distribution. Treatment with 1 mM ARS for 30 min was used as positive control  
 439 for stimulation of PABPC1 and mRNA nuclear localization.

440

441 **Nsp15 causes nuclear localization of PABPC1 accompanied by inhibition of cellular**  
 442 **protein synthesis by targeting cytosolic factors**

443 Next, we examined whether the nsp15-mediated PABPC1 nuclear relocation is associated with  
 444 cellular protein synthesis shutoff. Overexpression of wild type, but not catalytic-deficient nsp15  
 445 from PEDV, TGEV, PDCoV, SARS-CoV-1 and IBV, altered the localization of PABPC1  
 446 (yellow arrows) and this was associated with a strong reduction in puromycin signal (Fig 7, red  
 447 arrows). In agreement with the data in Fig 6, in cells expressing nsp15 of MERS-CoV and  
 448 SARS-CoV-2, nuclear localization of PABPC1 was observed in some but not all cells (Fig 7B).

449 In the MERS-CoV nsp15-expressing cells with nuclear PABPC1 localization, a weaker  
 450 puromycin signal was observed (**Fig 7B**, red arrows), whereas in nsp15-expressing cells in  
 451 which a change in localization of PABPC1 did not occur, no effect on puromycin signal was  
 452 observed (**Fig 7B**, magenta arrows). In the SARS-CoV-2 nsp15 expressing cells, no obvious  
 453 effect on puromycin signal was observed, no matter PABPC1 enters nucleus or retains in  
 454 cytoplasm (**Fig 7**, magenta arrows). As expected, catalytic-deficient mutants of all nsp15  
 455 neither changed PABPC1 distribution, nor reduced the puromycin signal, demonstrating that  
 456 the catalytic activity is required for both, PABPC1 redistribution and cellular translation shutoff.  
 457 These results, combined with those in **Fig 2**, **Fig 4** and **Fig 6**, demonstrate that overexpression  
 458 of nsp15 triggers nuclear retention of PABPC1 and that this is associated with a strong  
 459 inhibition of *de novo* protein synthesis. The SARS-CoV nsp15 is an exception for which does  
 460 not obviously inhibit the *de novo* protein synthesis in Vero cells.

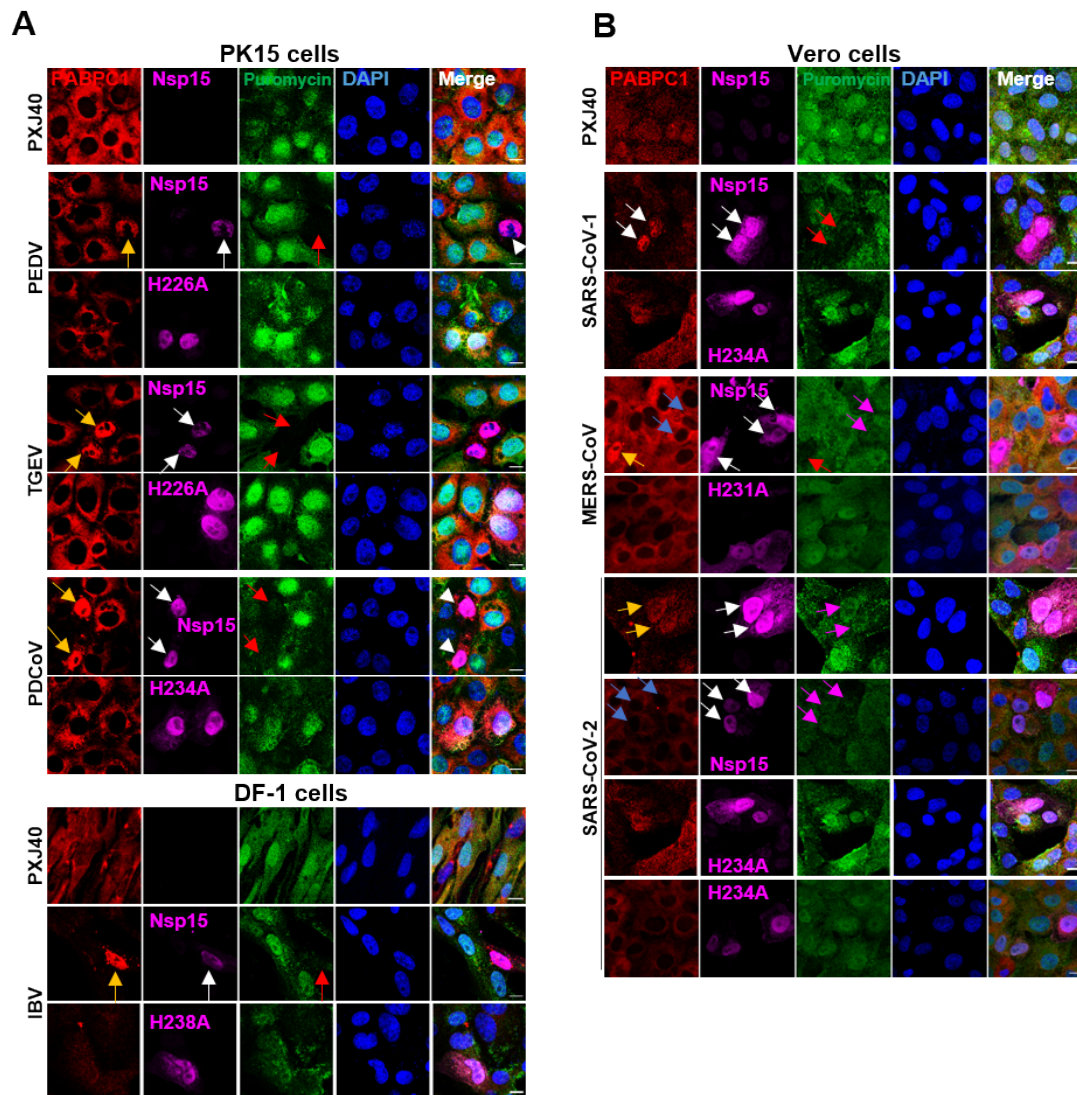

461

462

463 **Fig 7. The nsp15-mediated relocation of PABPC1, is accompanied by inhibition of *de novo***  
464 **protein synthesis.** The indicated cell lines were transfected with PXJ40 or with a plasmid  
465 encoding wild type or the corresponding catalytic-deficient Flag-tagged nsp15 of the indicated  
466 coronaviruses. After 23 h, puromycin labelling (5 µg/ml) was performed for 1 h. Indirect  
467 immunofluorescence was performed using anti-Flag (magenta), anti-PABPC1 (red), and anti-  
468 puromycin (green) antibodies. The nuclei were stained with DAPI (blue). White arrows indicate  
469 nsp15 expressing cells, yellow arrows indicate nsp15-expressing cells with PABPC1 nuclear  
470 retention, blue arrows indicate nsp15-expressing cells without PABPC1 nuclear retention, red  
471 arrows indicating cells with PABPC1 nuclear retention and reduced puromycin labelling,  
472 magenta arrows indicate cells expressing nsp15 of MERS-CoV and SARS-CoV-2 in which  
473 puromycin labelling.  
474

475 Next, we asked whether nsp15-induced protein translation shutoff may be caused by the  
476 ability of nsp15 to target cytosolic or nuclear factors or both. To this end, first a nucleus-free *in*  
477 *vitro* translation system (Rabbit Reticulocyte Lysate) was employed. Upon *in vitro* translation,  
478 IBV nsp15 reduced the expression of IBV N, IBV M, or luciferase, whereas catalytic-deficient  
479 nsp15 H223A and H238A did not (**Fig 8**). These data indicate that inhibition of translation by  
480 nsp15 can occur in the absence of nuclear factors, and that cytosolic factors involved in protein  
481 translation might be targeted by nsp15.

482 The observation that in nsp15-expressing cells PABPC1 nuclear retention is accompanied  
483 by protein shutoff but not by mRNA relocation, and that in some cells nsp15 localization largely  
484 overlaps with that of mRNA, combined with the observation that nsp15 may target cytosolic  
485 factors, suggests that nsp15 may interact with cellular mRNA itself or with (translation)  
486 complexes associated with the mRNA. The association of nsp15 to these complexes may  
487 compete or interfere with PABPC1 binding to the mRNA causing PABPC1 nuclear import,  
488 thereby leading to host protein translation shutoff. The targeting to host mRNA by nsp15 is  
489 further supported by the inability of catalytic-deficient nsp15 to trigger PABPC1 nuclear  
490 relocation and host-protein shutoff.

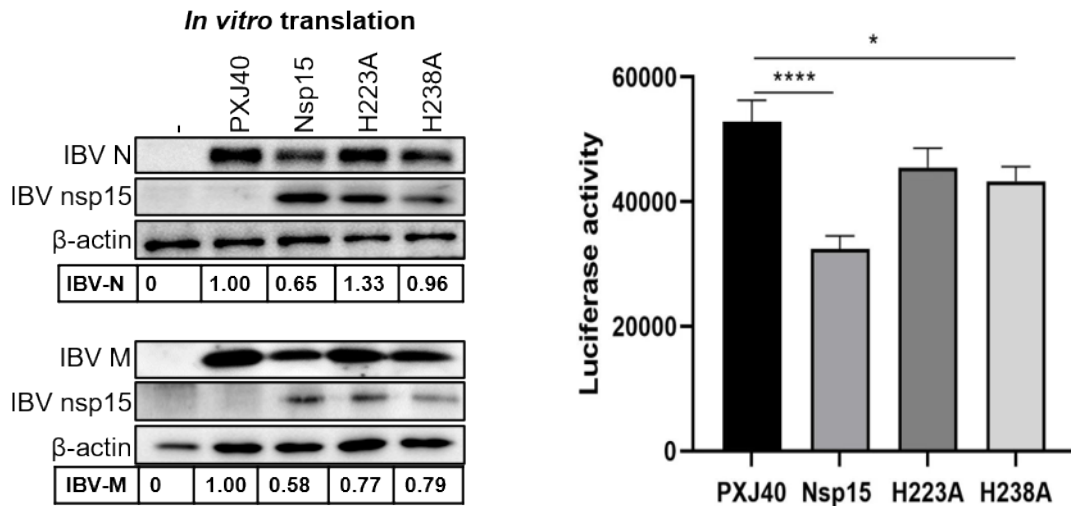

491

492 **Fig 8. IBV nsp15 targets cytoplasmic as well as nuclear factors to inhibit protein**  
493 **translation.** Plasmid encoding wild type or catalytic-deficient IBV nsp15 and reporter plasmid  
494 encoding IBV N or IBV M, or luciferase DNA, were co-incubated with Rabbit Reticulocyte  
495 Lysate for 1 h followed by Western blot analysis or luciferase assay. Density of the bands  
496 corresponding to the reporter proteins was normalized to the signal of  $\beta$ -actin and presented  
497 relative to the sample transfected with the empty vector PXJ40.

498

499 **Wild type IBV and the catalytic-deficient nsp15 mutant both induce host protein**  
500 **expression shutoff, but via different mechanisms**

501 After having assessed that nsp15 may be involved in regulation of host protein translation,  
502 possibly through a mechanism involving targeting cytosolic mRNA and relocation of PABPC1,  
503 we next evaluated the effect of nsp15 on host protein translation in the context of a virus  
504 infection. To this end, we used the previously reported catalytic-deficient nsp15 recombinant  
505 IBV (rIBV-nsp15-H238A), with an Alanine substitution in the nsp15 catalytic domain H238  
506 [29]. Western blot analysis after infection with wild type IBV (IBV-WT) or with the rIBV-  
507 nsp15-H238A mutant showed that, compared to uninfected cells, both viruses reduced  
508 puromycin labelling in DF-1 (**Fig 9A**) as well as H1299 cells (**Fig 9B**). IBV-WT did trigger a  
509 translational shutoff, however, it did not activate the PKR-eIF2 $\alpha$  pathway, as dsRNA levels  
510 remained low until 24 h.p.i. and the phosphorylation levels of dsRNA sensor PKR and  
511 translation initiation factor eIF2 $\alpha$  did not increase (**Fig 9B**), in agreement with our previous  
512 reports [29, 57, 82]. Thus, nsp15 helps virus degrade the viral dsRNA to escape the PKR-eIF2 $\alpha$   
513 dependent translation shutoff and subsequent stress response [29], which is detrimental for  
514 virus replication; in contrast, it might induce translation shut off through PKR-eIF2 $\alpha$   
515 independent strategies.

516 Although rIBV-nsp15-H238A replicating less (assessed by the lower viral N protein  
 517 expression), it reduced *de novo* protein synthesis to a similar extent as IBV-WT did (**Fig 9**). In  
 518 agreement with previous report [29], infection with rIBV-nsp15-H238A leads to accumulation  
 519 of higher levels of intracellular dsRNA intermediates than infection with IBV-WT, and this is  
 520 accompanied by high levels of p-PKR as well as p-eIF2 $\alpha$  (**Fig 9B**), ultimately leading to SGs  
 521 formation and activation of the type I IFN response [29]. This, combined with our current data  
 522 on puromycin labelling (**Fig 9**), confirms that rIBV-nsp15-H238A, but not IBV-WT, triggers a  
 523 PKR-eIF2 $\alpha$ -dependent translational shutoff that might impair both, host and viral protein  
 524 translation initiation. This host-mediated translation initiation checkpoint shutoff triggered by  
 525 rIBV-nsp15-H238A apparently did not benefit the virus, as synthesis of the viral N protein was  
 526 lower compared to rIBV-WT. Therefore, the PKR-eIF2 $\alpha$ -dependent translational shutoff,  
 527 together with the induction of type I IFN [29], are responsible for the lower replication of rIBV-  
 528 nsp15-H238A.

529 Taken all together, we hypothesize that both IBV-WT and rIBV-nsp15H238A cause host  
 530 translation shutoff, but via different mechanisms: (1) IBV-WT controls the accumulation of  
 531 viral dsRNA and therefore does not trigger the PKR-eIF2 $\alpha$  pathway for >24h, but triggers a  
 532 virus-mediate host translational shutoff that likely involves nsp15 and other viral proteins  
 533 including E protein, the accessory protein 5a and 5b through a yet unidentified mechanism.  
 534 (**Supplementary Fig 1, Fig 1, Fig 2, Fig 7, Fig 8**) [57]; (2) in the absence of nsp15 EndoU  
 535 activity, rIBV-nsp15-H238A is unable to control the amount of viral dsRNA and induces  
 536 translation shutoff through a host-mediated route involving the activation of the host PKR-  
 537 eIF2 $\alpha$ -mediated pathway [29].

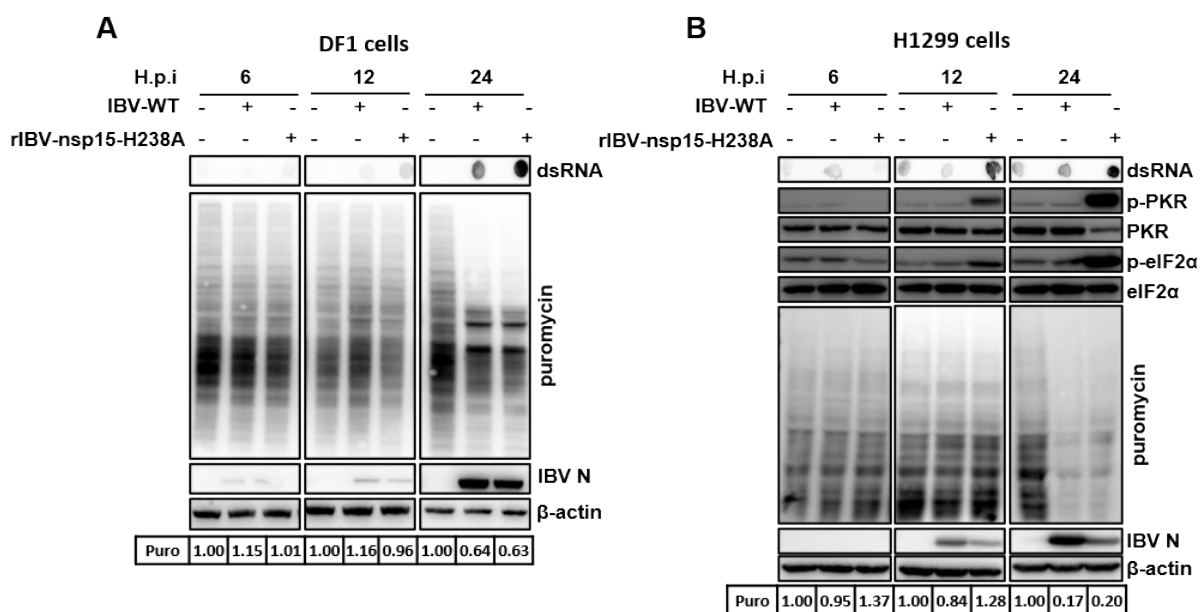

539 **Fig 9. Both IBV-WT and rIBV-nsp15-H238A downregulate cellular protein synthesis but**  
540 **through different mechanisms.** (A) DF-1 cells or (B) H1299 cells were infected with IBV-  
541 WT or rIBV-nsp15H1238A at an MOI of 1. At 6, 12, 24 h.p.i., cells were treated with  
542 puromycin (5 µg/ml) for 1 h, followed by western blot analysis to detect puromycin-labelled *de*  
543 *novo* peptides, IBV-N protein, and β-actin. Density of the puromycin labelled proteins was  
544 normalized to the signal of β-actin. Ratio of the puromycin-labelled *de novo* peptides of the  
545 infected cells (+) to that of the uninfected cells (-) at the same time h.p.i. is shown. (B) H1299  
546 cells were infected as described above followed by dot blot analysis to detects dsRNA and  
547 western blot analysis to detect p-PKR, PKR, p-eIF2α, eIF2α.

548

549 **PABPC1 and mRNA nuclear relocation occurs upon rIBV-nsp15-H238A but not wild**  
550 **type IBV infection**

551 As we observed after transfection a correlation between PABPC1 nuclear retention and  
552 inhibition of *de novo* protein synthesis only in cells overexpressing wild type but not catalytic-  
553 deficient nsp15 (**Fig 7**), while we observed a translation shutoff in both, IBV-WT- and rIBV-  
554 nsp15-H238A-infected cells (**Fig 9**), we next examined the localization of PABPC1 in cells  
555 infected with these two viruses. No changes in PABPC1 distribution were observed in most  
556 IBV-WT-infected cells at all time points after infection (**Fig 10A**, left panel), from 12 h.p.i.  
557 onwards, only few infected cells display the PABPC1 puncta aggregates colocalized with the  
558 SG core protein G3BP1 (**Supplementary Fig 4**), consistent with previous report [29]; in some  
559 but not all rIBV-nsp15-H238A-infected cells, from 12 h.p.i. onwards, nuclear localization of  
560 PABPC1 (**Fig 10A** right panel, **Supplementary Fig 5** right panel) or PABPC1 puncta  
561 aggregates colocalized with SG marker protein G3BP1 were observed (**Supplementary Fig 4**,  
562 **Supplementary Fig 5** right panel). As PABPC1 is involved in protein translation initiation in  
563 the cytoplasm, nuclear relocation or SG localization of PABPC1 after rIBV-nsp15-H238A  
564 infection, further suggests that rIBV-nsp15-H238A triggers a translation shutoff via a host-  
565 mediated mechanism. This host-mediated translation shutoff is detrimental to the virus as  
566 shown by the weaker viral N protein signal observed in rIBV-nsp15-H238A-infected cells with  
567 PABPC1 nuclear retention compared to infected cells without PABPC1 nuclear retention (**Fig**  
568 **10A**, right panel, yellow cycles).

569 FISH analysis further showed that upon infection with IBV-WT in both, Vero and DF-1  
570 cells, most mRNA is homogeneously distributed throughout the cells (**Fig 10B**, white circle or  
571 white arrows, **Supplementary Fig 4** left panel), whereas infection with rIBV-nsp15-H238A  
572 triggers PABPC1 nuclear retention or SG localization, and this is accompanied by mRNA

573 nuclear accumulation and aggregates to SGs (**Fig 10B**, yellow arrows, **Supplementary Fig 4**  
574 right panel). These results suggest that in IBV-WT-infected cells, viral mRNA translation  
575 occurs; the presence of viral mRNA causes PABPC1 to bind and be retained in the cytoplasm;  
576 in rIBV-nsp15-H238A-infected cells however, the host-mediated translation shutoff halts both,  
577 host and viral mRNA translation, thereby releasing PABPC1 from cytosolic host and viral  
578 mRNA, redirecting it to the nucleus; the nuclear relocation of PABPC1 further retains the host  
579 mRNA in the nucleus.

580

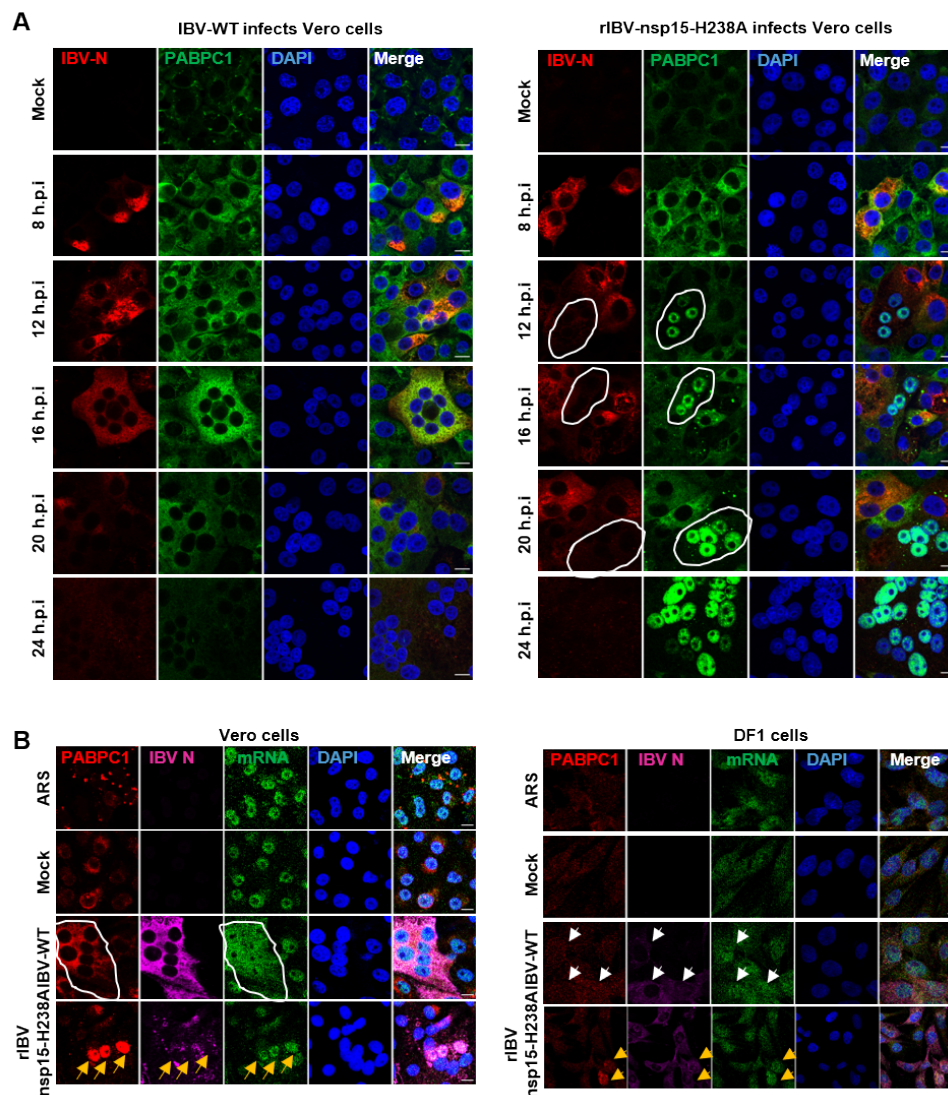

581

582 **Fig 10. Infection with rIBV-nsp15-H238A, but not with IBV-WT, triggers nuclear**  
583 **retention of both, PABPC1 and mRNA and is associated with lower viral protein synthesis.**  
584 (A) Vero cells were infected with IBV-WT (left panel) or rIBV-nsp15-H1238A (right panel) at  
585 an MOI of 1. At 8, 12, 16, 20 and 24 h.p.i, indirect immunofluorescence was performed to  
586 detect IBV-N protein (red), PABPC1 (green) and nuclei were stained with DAPI (blue). White  
587 circles indicate the rIBV-nsp15-H238A-infected cells that show nuclear localization of

588 PABPC1 and weaker IBV-N signal compared to rIBV-nsp15-H238A-infected cells that do not  
589 display nuclear localization of PABPC1. (B) Vero and DF-1 cells were infected with IBV-WT  
590 or rIBV-nsp15-H1238A at an MOI of 1. At 16 h.p.i., FISH and indirect immunofluorescence  
591 were performed to detect PABPC1 (red), IBV N (Purple), and mRNA (green). Nuclei were  
592 stained with DAPI (blue). White circle and white arrows indicate IBV-WT-infected cells in  
593 which no relocation of PABPC1 and a homogeneous distribution of mRNA was observed;  
594 yellow arrows indicate rIBV-nsp15-H238A-infected cells that show nuclear localization of both,  
595 PABPC1 and mRNA.

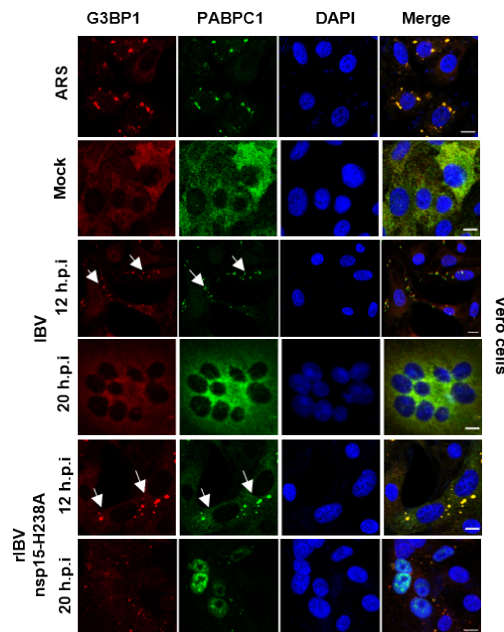

596 **Supplementary figure 4. Infection with rIBV-nsp15-H238A, but not with IBV-WT,**  
597 **triggers PABPC1 nuclear retention. In the infected cells with SG formation, PABPC1**  
598 **aggregates to SG. (A) Vero cells were infected with IBV-WT or rIBV-nsp15-H1238A at an**  
599 **MOI of 1. At 12 and 20 h.p.i, indirect immunofluorescence was performed to detect G3BP1**  
600 **(red), PABPC1 (green) and nuclei were stained with DAPI (blue). White arrows indicate the**  
601 **infected cells with SG formation and SG localization of PABPC1.**  
602  
603



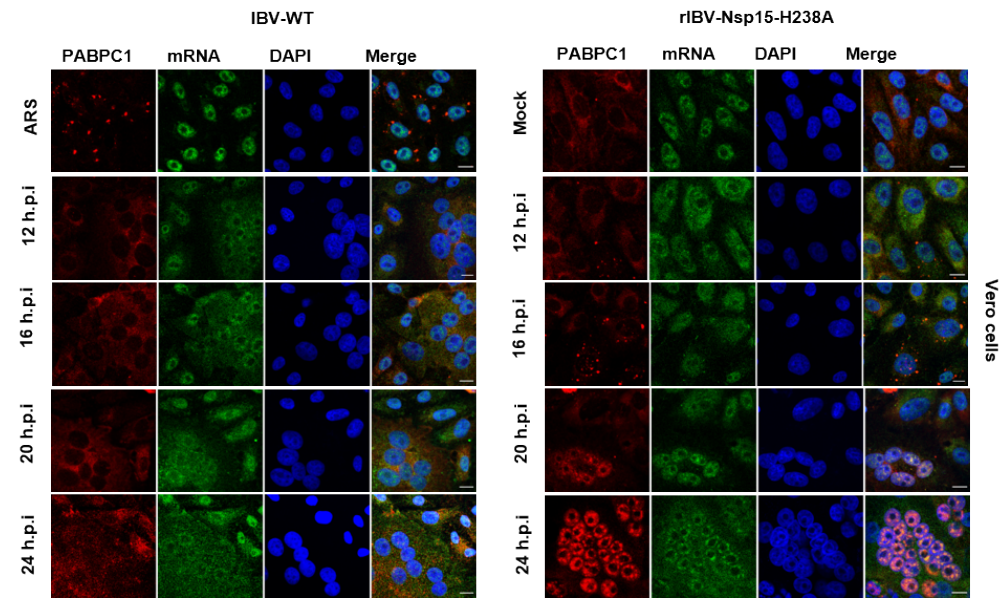

604

605

606 **Supplementary figure 5. Infection with rIBV-nsp15-H238A, but not with IBV-WT,**  
607 **triggers nuclear retention or SG localization of both PABPC1 and mRNA.** (A) Vero cells  
608 were infected with IBV-WT (left panel) or rIBV-nsp15-H1238A (right panel) at an MOI of 1.  
609 At 12, 16, 20 and 24 h.p.i, FISH and indirect immunofluorescence were performed to detected  
610 PABPC1(red) and mRNA (green). Nuclei were stained with DAPI (blue).

611

### 612 **IBV nsp15 exhibits different subcellular localization after plasmid transfection and IBV** 613 **infection**

614 Subcellular localization is one of the key determinants for proteins access to their interacting  
615 partners, which provides important clues about proteins' function. Thus, we examined the  
616 subcellular localization of IBV nsp15 expressed upon plasmid transfection and during IBV  
617 infection in DF-1 cells. Indirect immunofluorescence showed that exogenous Flag-tagged  
618 nsp15 localized to the cytoplasm, and likely also the nucleus (**Fig 11A**, upper panel; also visible  
619 in **Fig 2, Fig 5, and Fig 7**); however, upon IBV-WT or rIBV-nsp15-H238A infection,  
620 perinuclear aggregates of nsp15 or nsp15-H238A can be observed (**Fig 11A**, middle and low  
621 panels). These results show that nsp15 has different subcellular localizations in the context of  
622 plasmid transfection and virus infection. We hypothesize that during virus infection, nsp15  
623 usually interacts with other viral nsps or viral RNA and locates to RTC to help virus genome  
624 replication and reduce viral dsRNA load [29], whereas when overexpressed, it cannot associate  
625 to RTC (owing to the absence of viral RNA and of other viral proteins) and is able to distribute  
626 throughout the cytoplasm and nucleus. The co-localization of nsp15 and RTC core protein  
627 RdRp nsp12 in **Fig 11B** further suggests that nsp15 indeed localizes to RTC during virus  
628 infection.

629 We next asked whether nsp15 is associated to the translation machinery ribosomes and/or  
 630 polysomes. For this purpose, Vero cells were infected with IBV-WT or rIBV-nsp15-H238A.  
 631 After 18 h.p.i., cells were treated with translation elongation inhibitor cycloheximide (CHX) to  
 632 immobilize ribosomes, lysed, and then subjected to a 7–47% sucrose density gradient  
 633 ultracentrifugation. The fractions were analysed by Western blot to assess the distribution of  
 634 nsp15 in the gradient fractions. The eIF4E protein was detected at fractions 1-4, and the  
 635 ribosomal S6 protein (Rps6) was detected at fractions 4-11, representing mono-ribosomes and  
 636 polysomes, respectively. In both, IBV-WT- and rIBV-nsp15-H238A-infected cells, nsp15 or  
 637 nsp15-H238A was co-fractionated with Rsp6 at fraction 5-11, confirming its association with  
 638 the host translation machinery, polysomes. It was noted that rIBV-nsp15-H238A infection led  
 639 to a shift of Rsp6 to the lighter fractions 5-9, likely due to the host mediated translation shutoff  
 640 ( $\rho$ -eIF2 $\alpha$ -mediated translation initiation shutoff) which results in fewer polysomes and lower  
 641 translation efficiency. It was worth noting that in rIBV-nsp15-H238A-infected cells, nsp15-  
 642 H238A was detected in fractions 7-9, at the expected apparent molecular weight, whereas when  
 643 detected in fractions 10-12, it displayed a higher apparent molecular weight, due to a yet  
 644 unknown mechanism.

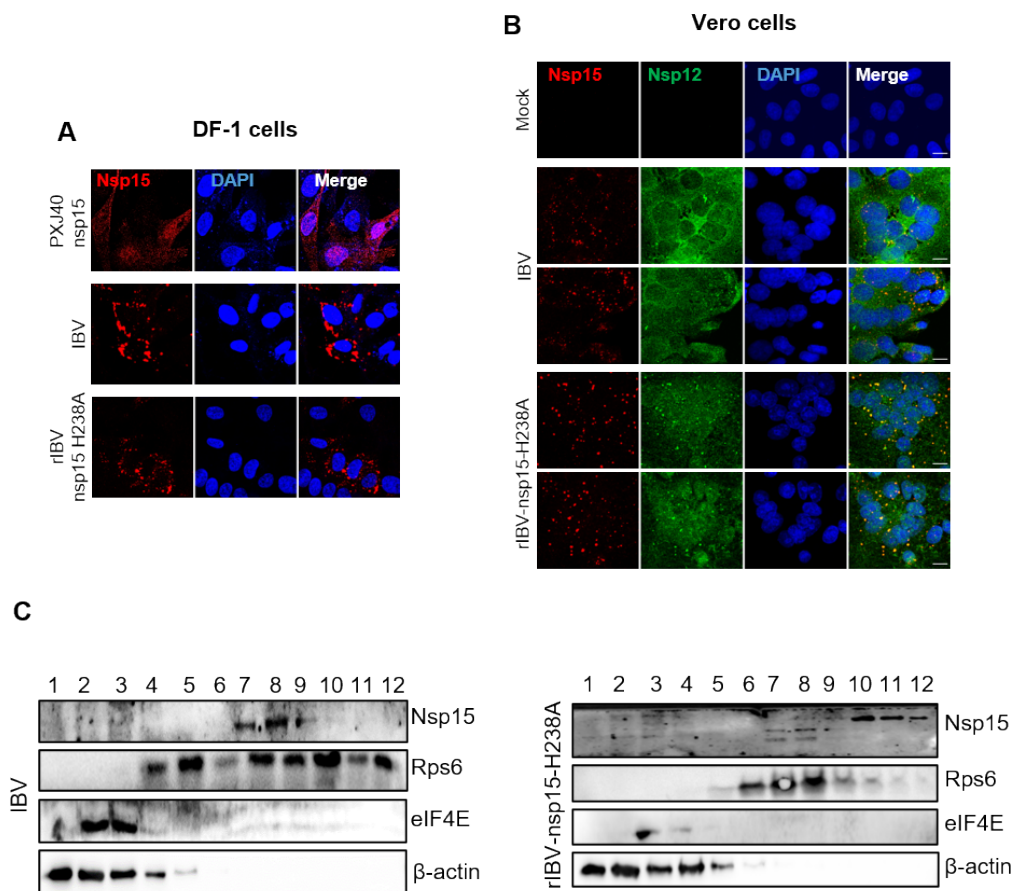

645

646 **Fig 11. IBV nsp15 exhibits different subcellular localization after plasmid transfection**  
647 **and virus infection.** (A) DF-1 cells were transfected with a plasmid coding Flag-tagged nsp15  
648 (PXJ40F-nsp15). At 24 h.p.t, indirect immunofluorescence was performed with a chicken anti-  
649 Flag-tag antibody (red). Nuclei were stained with DAPI (blue). (B) Vero cells were infected  
650 with IBV-WT or rIBV-nsp15-H238A at an MOI=1. At 18 h.p.i, indirect immunofluorescence  
651 was performed with a mouse anti-IBV-nsp15 monoclonal antibody (red), a rabbit anti-IBV-  
652 nsp12 polyclonal antibody (green) and the nuclei were stained with DAPI (blue). (C) Vero cells  
653 were infected with IBV or rIBV-nsp15-H238A with an MOI of 1. At 18 h.p.i., cells were treated  
654 with 100 µg/mL cycloheximide (CHX) for 15 min at 37°C and subjected to 7–47% sucrose  
655 density gradient ultracentrifugation (38,000 rpm for 3 h), and the fractions were analysed by  
656 Western blot to detect nsp15, Rsp6, eIF4E, and β-actin (left panel).

657

## 658 Discussion

659 Several viruses encode ribonuclease and employ fine-tuned tactics to control viral as well as  
660 host mRNA expression balancing viral and host protein expression [73, 83-85]. The conserved  
661 EndoU nsp15 is the unique genetic marker of *Nidovirale*, as it is not present in other RNA virus  
662 families. In our previous study, nsp15 was found to suppress SG formation, either by preventing  
663 the accumulation of viral dsRNA or by targeting unknown host factors [29]. Thus, the role of  
664 nsp15 was shown to be more complex than originally believed, primarily because it has the  
665 potential to act on virus as well as cellular substrates. Although the role of nsp15 on the  
666 regulation of viral RNA is well studied [26, 27, 29, 86], the cellular substrates targeted by nsp15  
667 are not yet known. In this study, by transfecting nsp15-encoding plasmids into eukaryotic cells,  
668 we show that nsp15 of different genera of coronaviruses inhibits the global protein synthesis,  
669 and that this inhibition is accompanied by the re-localization of the poly(A) tail binding protein  
670 PABPC1 to the nucleus. These activities were largely abolished when expressing catalytic-  
671 deficient nsp15, demonstrating the involvement of EndoU activity in the protein translation  
672 shutoff. This is the first report that coronavirus encoded EndoU is involved in regulation of host  
673 gene expression.

674 Protein translation initiation is a major step that determines the efficiency of host protein  
675 synthesis and viral protein synthesis [87]. PABPC1 is a nucleocytoplasmic shuttling protein  
676 that is predominantly located in the cytoplasm to help translation initiation by simultaneously  
677 interacting with the mRNA poly(A) tail and the eukaryotic initiation factor 4F complex (eIF4F),  
678 which binds to 5' cap of mRNA and is part of the translation complex (TC); after bringing the  
679 mRNA-TC to ribosomes, PABPC1 is released and can bind the importin α/β complex, which  
680 mediates nuclear import of PABPC1 [80, 88-90]. In response to various pathogenic and non-  
681 pathogenic stressors, PABPC1 relocates to the nucleus or aggregates to the SGs [80, 91-93].

682 High levels of PABPC1 after nuclear relocation promote hyperadenylation and nuclear  
683 retention of mRNA [94], thereby restrict general gene expression.

684 In this study, we observed nuclear relocation of PABPC1 associated with protein  
685 translation shutoff in all nsp15 over-expressing cells. Considering that PABPC1 is able to  
686 shuttle between the nucleus and the cytoplasm [79] and that previous reports showed that  
687 blocking mRNA export from the nucleus to the cytoplasm usually causes nuclear retention of  
688 PABPC1 [80], we asked whether the nsp15 associated nuclear relocation of PABPC1 is the  
689 result of inhibition of PABPC1 nuclear export or enhanced nuclear import. *In situ* hybridization  
690 detecting poly(A) mRNA transcripts, did not reveal nuclear retention of mRNA in nsp15-  
691 expressing cells. This indicates that EndoU nsp15 does not block mRNA nuclear export to  
692 retain PABPC1 in the nucleus, and that nuclear relocation of PABPC1 is therefore the result of  
693 enhanced nuclear import. Nuclear import of PABPC1 is dependent on interaction with  
694 importin- $\alpha/\beta$  complex [80]. The motifs of PABPC1 that bind to importin- $\alpha/\beta$  complex are the  
695 same that recognize and bind mRNA [80, 95]; therefore, the dissociation from cytoplasmic  
696 mRNA leads to the exposure of PABPC1's nuclear import signal and shuttling to the nucleus  
697 [80, 95], resulting in the observed inhibition of cellular protein expression. The dissociation of  
698 PABPC1 from cytoplasmic mRNA may be caused by the binding of nsp15 to (host) mRNA,  
699 thereby competing with PABPC1, as suggested by the general co-localization of nsp15 from all  
700 investigated coronaviruses with cellular mRNA. Furthermore, specifically in PK15 cells  
701 expressing nsp15 of porcine coronaviruses (TGEV, PEDV, PDCoV), a reduction in cellular  
702 mRNA signal was observed, supporting the possibility that nsp15 from some coronaviruses  
703 may not only bind, but also degrade host mRNA. Taken together, the relocation of PABPC1 to  
704 the nucleus, likely caused by the competition for cellular mRNA binding and/or mRNA  
705 degradation by nsp15, may therefore be the consequence, not the cause, of translation shutoff.  
706 This is further supported by the nucleus-free *in vitro* translation study, showing that inhibition  
707 of protein translation by nsp15 is not dependent on PABPC1 nucleus entry.

708 To assess whether nsp15 mediates host protein translation shutoff also during a virus  
709 infection, we infected cells with wild type IBV (IBV-WT) and the catalytic-deficient nsp15-  
710 H238A recombinant IBV (rIBV-nsp15-H238A). Interestingly, we found that both viruses  
711 inhibited host protein synthesis but via different mechanisms. IBV-WT inhibited host protein  
712 expression in an eIF2 $\alpha$  check point-independent manner likely through a yet unknown virus-  
713 mediated mechanism, while rIBV-nsp15-H238A triggered host protein shutoff in a manner  
714 dependent on the activation of the dsRNA-PKR-eIF2 $\alpha$  pathway, due to the accumulation of  
715 higher levels of dsRNA during this mutant virus infection. Surprisingly, nuclear retention of

716 PABPC1 typical of nsp15-expressing cells, was not observed in IBV-WT-infected cells,  
717 whereas PABPC1 nucleus accumulation or SG aggregation was clearly observed in rIBV-  
718 nsp15-H238A-infected cells. The apparent contradiction with respect to PABPC1 re-  
719 localization between transfection and infection conditions might be explained by the presence  
720 of viral RNA during infection. Infection with IBV-WT causes host protein translation shutoff,  
721 but viral mRNAs (with poly(A) tail) may still bind to cytoplasmic PABPC1 for their own  
722 translation [96], thereby retaining PABPC1 in the cytoplasm. Infection with rIBV-nsp15-  
723 H238A, however, results in the accumulation of dsRNA due to the loss of nsp15 EndoU activity;  
724 this causes the activation of the PKR-eIF2 $\alpha$  pathway, which in turn causes both, global mRNAs  
725 translation shuts off and aggregation of host and/or viral mRNAs to SGs, after which PABPC1  
726 is released from host/viral mRNA and shuttles to the nucleus. This hypothesis is supported by  
727 previous studies showing the low abundance of cytoplasmic mRNA releases PABPC1 into  
728 nucleus [62, 95, 97]. Intriguingly, in rIBV-nsp15-H238A-infected cells, PABPC1 nuclear  
729 localization was accompanied by lower IBV-N protein signal compared to cells without  
730 PABPC1 nuclear relocation. This might be due to the stalled viral mRNA translation that  
731 releases more PABPC1 which in turn can enter into the nucleus. This phenomenon further  
732 suggests that re-localization of PABPC1 to the nucleus is a consequence of stalled translation  
733 initiation and dissociation of PABPC1 from mRNA.

734 The eIF2 $\alpha$  phosphorylation-induced host shutoff inhibits both host and viral protein  
735 synthesis and is an anti-viral defence mechanism of the host [98, 99], while the eIF2 $\alpha$ -  
736 independent translation shutoff might specifically regulate the host protein expression [70].  
737 Thus, wild type IBV might specifically shutoff host protein expression by hijacking the host  
738 translation machinery through a yet unknown mechanism, in which nsp15, 5a, 5b, E, and S  
739 might be involved in (supplementary Fig 1) [56, 57]. Kint et al showed that the 5b is  
740 indispensable for host translation shut off by using the 5b null IBV [57], and Xiao demonstrated  
741 that IBV and SARS-CoV S protein bind to eIF3F and this interaction led to the inhibition of  
742 translation of a reporter gene [56]. Thus, we speculate that nsp15 inhibits host translation  
743 together with other viral proteins. However, rIBV-nsp15-H238A may cause translation shutoff  
744 through a host-mediated mechanisms based on phosphorylation of eIF2 $\alpha$  caused by  
745 accumulation of dsRNA. The high level of phospho-eIF2 $\alpha$ , induced by dsRNA activation of  
746 the PKR-eIF2 $\alpha$  pathway, hampers the translation initiation step (Met-tRNA recruiting). This  
747 effectively stops both, host and viral protein translation, resulting in lower viral replication  
748 reflected by the reduced expression of the viral N protein. Nevertheless, the various  
749 mechanisms of translation shutoff triggered with or without nsp15 EndoU activity during virus

750 infection, indicate that nsp15 plays a role in regulating protein translation in a way that benefits  
751 viral replication: by promoting the host translation shutoff via targeting to cytoplasmic factors  
752 and by avoiding the activation eIF2 $\alpha$ -dependent translation shutoff via reducing the dsRNA  
753 formation.

754 Subcellular localization is one of the determinants for proteins to properly exert their  
755 functions. When over-expressed, nsp15 has a dispersed cytoplasmic and nuclear localization as  
756 no viral RNA or viral proteins are present to interact with or to recruit it to RTC. The  
757 cytoplasmic and nuclear distribution, enable nsp15 to target cellular substrates in the cytoplasm  
758 and the nucleus. During virus infection however, IBV nsp15 (**Fig 11**) and MHV nsp15 [100]  
759 display a perinuclear aggregated localization, colocalized with RdRp nsp12, the catalytic centre  
760 of the RTC [101]. Endoplasmic reticulum (ER) membrane transformation termed DMV during  
761 SARS, MERS or MHV infection, or zippered ER and spherules single membranes during IBV  
762 infections [22-24, 102-104], and collectively referred to as membrane rearrangements, provide  
763 a viral RNA replication microenvironment by accommodating the RTC. The association of  
764 coronavirus nsp15 with RTC implies that this EndoU may locate inside ER membrane  
765 rearrangements, as also suggested by IBV nsp15 perinuclear localization during infection and  
766 its co-localization with RTC-associated proteins like nsp12. Inside membrane rearrangements,  
767 nsp15 EndoU may cleave viral RNAs to reduce dsRNA accumulation. The membrane  
768 rearrangements are connected to each other, there is contiguity with the membrane donor of the  
769 ER [24], and the ribosomes are associated with the outer membrane [105-107]. Recently,  
770 cryotomography revealed that DMVs of MHV contain membrane spanning structures, a  
771 hexameric, crown-shaped pore complex surrounding a central channel that would allow RNA  
772 and protein transport [108]. The nucleocapsid structure was visualized on the cytosolic side of  
773 the pore, suggesting that the RNA is encapsidated following the export from DMVs [108]. Thus,  
774 although nsp15 is associated with the RTC or membrane vesicles during virus infection, it is  
775 still possible for it to locate outside membrane vesicles and to target host mRNA or the  
776 ribosomes in the outer membrane of vesicles, thereby interfering with host translation and this  
777 was also confirmed by our fractionation studies showing that nsp15 is associated to the  
778 translation machinery, and specifically to polysomes. Investigation into the kinetics of nsp15  
779 production and formation of membrane rearrangements is necessary to track the location of  
780 nsp15 and analyse its roles during virus infection. In addition, regulation by other viral proteins  
781 interacting with nsp15 can also be a way to fine-tune nsp15's roles during virus infection. We  
782 attempted to investigate whether nsp15 specifically inhibits host mRNA translation or also  
783 suppresses viral mRNA translation, by constructing the plasmid containing viral genomic 5'

784 leader sequence, 5' UTR (untranslated region), transcription regulation sequence, IBV N gene,  
785 to mimic viral subgenomic mRNA structure; however, the translation of this construct was still  
786 suppressed by co-transfected with IBV nsp15, probably due to lacking the 3' sequence  
787 downstream of N gene. We will further construct the plasmid containing 5' end and 3' end of  
788 viral subgenomic mRNA, to fully mimic viral mRNA structure, for checking whether nsp15  
789 viral mRNA translation.

790 Inhibiting host antiviral gene expression is an important strategy for viruses to  
791 antagonize the host innate immune response. Previous studies have reported that coronaviruses  
792 shut down host translation by various mechanisms.  $\alpha$ - and  $\beta$ -coronaviruses employ nsp1 to  
793 trigger host translation shutoff via multiple strategies [109]: interference with ribosomal  
794 function [44, 110, 111], endo-nucleolytic cleavage of 5' capped non-viral mRNA that triggers  
795 its degradation [44, 48, 50, 68], interference with nucleocytoplasmic transport of host mRNA  
796 leading to its nuclear retention [45, 46], or halting translation of host mRNA by targeting  
797 mRNA derived from the nucleus [48]. SARS-CoV-2 nsp14 and nsp16 also inhibit host  
798 translation, through a mechanism in which nsp16 suppresses global mRNA splicing and  
799 prevents the production of mature host mRNA [112, 113]. We previously reported that IBV, a  
800  $\gamma$ -coronavirus, which lacks nsp1, also inhibits host translation through a yet unknown  
801 mechanisms that likely involves accessory protein 5b [53]. In the current study, by comparing  
802 the activity of wild type and catalytic-deficient nsp15 in the context of a viral infection or when  
803 over-expressed alone in eukaryotic cells after transfection, we were able to show that, besides  
804 the well characterized activity of nsp15 on viral dsRNA, nsp15 of IBV and of other  
805 coronaviruses exerts additional functions by also targeting host substrates, ultimately leading  
806 to suppression of host protein synthesis. The role of nsp15 in the regulation of host and viral  
807 protein expression is summarized in the model shown in **Fig 12**: (0) under steady-state  
808 conditions, newly transcribed mRNA is bound by PABPC1 in the nucleus, the complex shuttles  
809 to the cytoplasm where it immediately interacts with elongation initiation factors (eIF) part of  
810 the translation complex (TC), which in turn recruit first the 40S and then the 60S ribosomal  
811 subunits to start translation; translation initiation releases the mRNA from PABPC1 which  
812 binds to importin- $\alpha/\beta$  complex to shuttle back into the nucleus, where the cycle begins again.  
813 (1) When expressed alone (after transfection of nsp15-coding plasmids), nsp15 targets host  
814 substrates involved in mRNA translation by possibly targeting mRNA itself and/or factors  
815 associated to the TC, leading to dissociation of PABPC1 from cellular mRNA, its re-  
816 localization to the nucleus; for all this, the EndoU activity of nsp15 is indispensable. (2) Wild  
817 type IBV induces a host translation shutoff that specifically restricts host and benefits viral

818 protein synthesis by hijacking the translation machinery; for this, nsp15 and the previously  
 819 reported accessory protein 5b, 5a and E in our screen data (supplementary Fig 1), might both  
 820 be involved. (3) Catalytic-deficient-nsp15-IBV can no longer regulate the levels of viral dsRNA  
 821 [29] and therefore triggers a dsRNA-PKR-eIF2 $\alpha$ -mediated host shutoff that hampers both, host  
 822 and viral mRNA translation, causes nuclear re-localization of PABPC1, and restricts viral  
 823 replication. The perinuclear localization of nsp15 during IBV infection, suggest that it can be  
 824 associated to membrane rearrangements (zipped ER or spherules) that would give it access not  
 825 only to viral RNAs to regulate the abundance of dsRNA [22], but also ribosomes and/or host  
 826 mRNA normally associated to the same membrane rearrangements.

827

828 This is a novel finding on the role of nsp15 to regulate host and viral gene expression,  
 829 and increases our understanding on the regulation mechanisms of host translation by  
 830 coronaviruses. Since the EndoU are conserved genetic marker of *Nidovirales*, the mechanisms  
 831 of this EndoU as host translation suppressor may be a breakthrough in finding common  
 832 strategies employed by coronaviruses, even by nidoviruses.

833

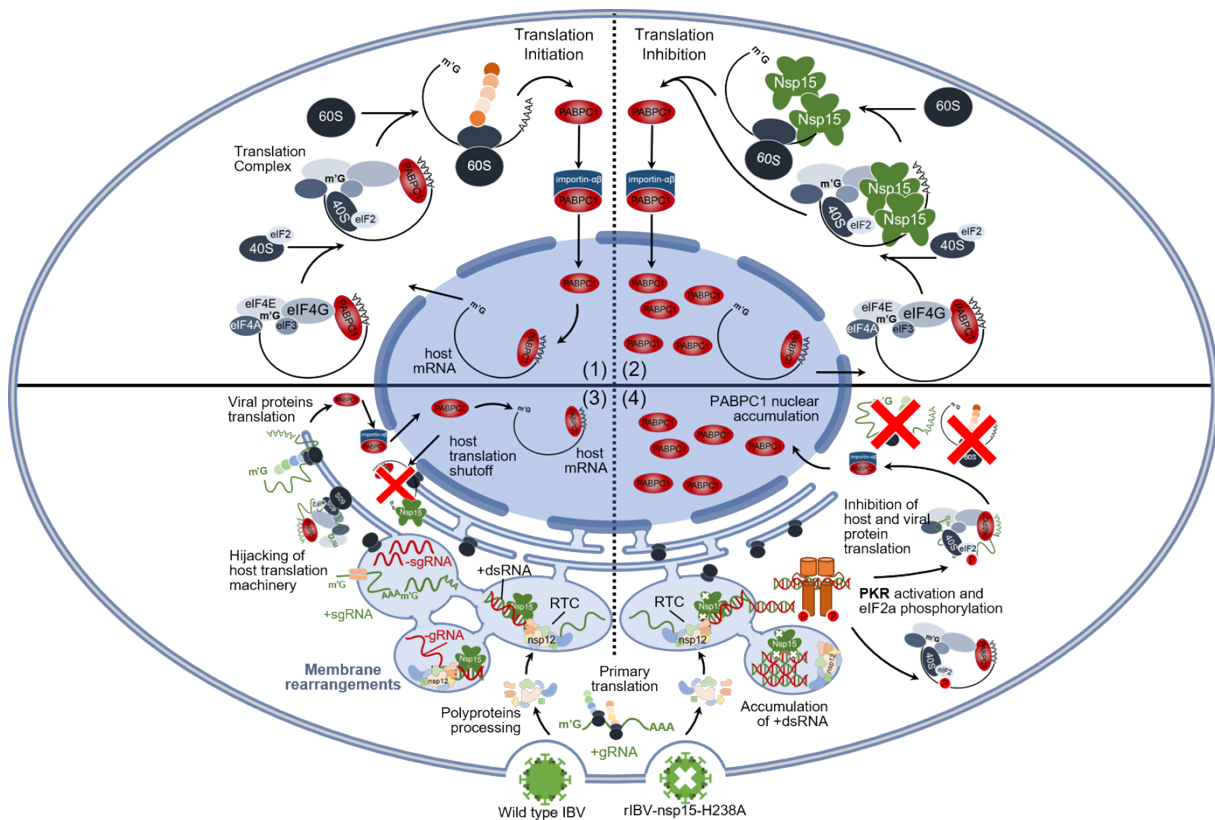

834

835 **Fig 12. Working model of the mode of action on host protein translation of nsp15 when**  
 836 **expressed alone or in the context of IBV infection. (1) host mRNA translation and PABPC1**  
 837 **turnover under normal conditions; (2) host mRNA translation upon overexpression of wild type**



838 IBV nsp15 leading to host-translation shutoff and nuclear accumulation of PABPC1; (3)  
839 simplified overview of the events occurring upon wild type IBV infection, ultimately leading  
840 to host-translation shutoff through a hijacking of the host translation machinery in favour of  
841 viral protein translation. (4) simplified overview of the events occurring upon catalytic mutant  
842 rIBV-nsp15-H238A infection. Catalytic-deficient nsp15 is no longer able to control the levels  
843 of viral dsRNA intermediates, leading to a dsRNA-PKR-eIF2 $\alpha$ -mediated host-protein shutoff  
844 that limits both, host and viral protein synthesis, thereby leading to nuclear accumulation of  
845 PABPC1. For details refer to the main text.

## 846 **Materials and Methods**

### 847 **Cells and Viruses**

848 Human non-small cell lung carcinoma H1299 cells were purchased from Cell Bank of Chinese  
849 Academy of Sciences (Shanghai, China). Chicken embryo fibroblasts DF-1 cells (ATCC®  
850 CRL-12203™), African green monkey kidney epithelial Vero cells (ATCC®CCL-81™) and  
851 human embryonic kidney HEK293T cells (ATCC® CRL-3216™) were purchased from ATCC.  
852 Porcine kidney epithelial cells (PK15) were provided from Prof. Hongjun Chen (Shanghai  
853 Veterinary Research Institute, CAAS, China). LLC-PK1 and ST cells were provided by Prof.  
854 Tongling Shan (Shanghai Academy of Agricultural Sciences, CAAS). H1299 cells were  
855 maintained in Roswell Park Memorial Institute 1640 medium (RPMI, 21875034, Gibco™)  
856 supplemented with 10% (v/v) foetal bovine serum (FBS, Gibco). The rest of the cell lines were  
857 grown in Dulbecco's modified eagle medium (DMEM, Gibco™) containing 10% fetal bovine  
858 serum (FBS, Gibco).

859 A mammalian cell adapted Beaudette IBV strain obtained from Prof Dingxiang Liu  
860 (Huanan Agricultural University, China) [114] was used in this study, as this IBV strain can be  
861 propagated in the DF-1 cells as well as in some mammalian cells, including Vero and H1299  
862 cell lines [115]. The recombinant virus rIBV-nsp15-H238 was retrieved and its generation  
863 described in details our previous study [116].

864

### 865 **Plasmids**

866 V5-tagged constitutively active form (N-terminus 1-1920 bp) of chicken MDA5 [V5-  
867 chMDA5(N)] and full-length chicken IRF7 (V5-chIRF7) were respectively cloned into pcDNA  
868 3.1 vector and HA-tagged full-length chicken MAVS was cloned into the pCAGGS vector  
869 (provided by Yuqiang Cheng) [117]. The epitope tag is located at the C-terminus of the inserted  
870 gene. The plasmid pEGFP-N1 encoding enhanced green fluorescent protein (EGFP) was  
871 provided by Prof Yingjie Sun (Shanghai Veterinary Research Institute, CAAS, China).

872 Construction of plasmids encoding IBV nsp2, nsp3, nsp4, nsp5, nsp6, nsp7, nsp8, nsp9, nsp10,  
873 nsp12, nsp13, nsp14, nsp15, nsp16, 3a, 3b, 5a, 5b, S, E, M, N, IAV NS1, PEDV nsp15, TGEV  
874 nsp15, SARS-CoV-1 nsp15, SARS-CoV-2 nsp15, and the catalytic-deficient mutants of the  
875 above nsp15 were cloned into vector PXJ40F, as described previously [29]. MERS-CoV nsp15  
876 cDNA was purchased from Sangon Biotech, PDCoV-nsp15 cDNA was provided by Prof.  
877 Tongling Shan (Shanghai Veterinary Research Institute), and both were inserted into a PXJ40F  
878 vector. The oligomerization-deficient mutants of IBV nsp15 (IBV nsp15-D285A and IBV  
879 nsp15-D315A), and the catalytic-deficient mutants of MERS-CoV nsp15 and PDCoV nsp15  
880 (MERS-CoV nsp15-H231A and PDCoV nsp15-H219A), were cloned using Mut Express II  
881 Fast Mutagenesis Kit V2 (C214, Vazyme). The mutagenesis primers were: for IBV nsp15-  
882 D285A, 5'-TGTTGTggcTTTACTGCTTGATGATTTCTTAGAACTTC-3' (F) and 5'-  
883 GCAGTAAagcACAACAGTACACACTTGCTTGTA-3' (R); for IBV nsp15-D315A, 5'-  
884 GTGTCAATTgctTACCATAGCATAAATTTTATGACTTGG-3' (F) and 5'-  
885 TGGTAagcAATTGACACTGTTACAACCTTTGACTT-3' (R); for MERS-CoV nsp15-  
886 H231A, 5'-TTTTGAGgccGTAGTCTATGGAGACTTCTCTCATACTACG-3'(F) and 5'-  
887 AGACTACggcCTCAAAGCATAGTTTTCCAAGCC-3'(R); for PDCoV nsp15-H231A, 5'-  
888 CGGAACTgccACACTTATCTCACTAGTTAAAAACAAGTTTG-3' (F) and 5'-  
889 TAAGTGTggcAGTTCGCCAATGACTGGACTG -3' (R). The underlined sequences were  
890 the targeted sites for the mutations.

891

## 892 **Primary antibodies**

893 Mouse anti-V5 (Thermo fisher scientific, #R961-25, horseradish peroxidase HRP-conjugated),  
894 mouse anti-HA (MBL, #M180-7, HRP-conjugated), mouse anti-Flag (MBL, #M185-7, HRP-  
895 conjugated), were diluted by 1:2500 for Western Blot; mouse anti- $\beta$ -actin (CST, #3700S),  
896 rabbit anti-GFP (CST, #2956), chicken anti-Flag (Gentaur, #AFLAG), rabbit anti-  
897 phosphorylated PKR (Abcam, #ab32036), rabbit anti-PKR (CST, #12297), rabbit anti-  
898 phosphorylated eIF2 $\alpha$  (CST, #3398), rabbit anti-eIF2 $\alpha$  (CST, #5324), anti-RPS6 rabbit mAb  
899 (CST, #2217) and eIF4E rabbit mAb (CST, #2067), were diluted by 1:1000 dilution for Western  
900 Blot; rabbit anti-IBV N (provided by Prof Dingxiang Liu, South China Agricultural University,  
901 China) was diluted by 1:2000 for Western blot; rabbit anti-human PABPC1 (Abcam, #Ab21060,  
902 cross-reacts against chicken PABPC1 in DF-1 cells), rabbit anti-IBV-N, anti-IBV nsp12 rabbit  
903 pAb (provided by Prof Dingxiang Liu, South China Agricultural University, China), anti-IBV  
904 nsp15 mouse mAb (provided by Dr. Min Liao's lab, Zhejiang University, China), were diluted  
905 by 1:500 for immunofluorescence; mouse anti-puromycin (Sigma-Aldrich, #MABE343) was

906 diluted by 1:25000 for Western blot and 1:10000 for immunofluorescence; anti-dsRNA mouse  
907 mAb J2 (Scicons, #10010200) was diluted by 1:1000 for dot blot analysis.

908

### 909 **Secondary antibodies**

910 Goat anti-rabbit IgG (H+L) (ABclonal, #AS014, HRP-conjugated) and goat anti-mouse IgG  
911 (H+L) (ABclonal, #AS003, HRP-conjugated) were diluted by 1:5000 for Western blot or dot  
912 blot; goat anti-chicken IgY (H+L) (Invitrogen, # A-11041, Alexa Fluor 568-conjugated), goat  
913 anti-mouse IgG (H+L) (Invitrogen, #A-11029, Alexa Fluor 488-conjugated), goat anti-rabbit  
914 IgG (H+L) (Invitrogen, #A-11034, Alexa Fluor 488-conjugated) were diluted by 1:500 for  
915 immunofluorescence.

916

### 917 **Chemicals**

918 Puromycin (Merck, #58-58-2, reconstituted with sterile H<sub>2</sub>O to 50 mg/mL as stock solutions);  
919 Fugene (HD) (Promega, #E2311); Opti-MEM (Gibco™, #31985062); TRIzol reagent (Life  
920 Technologies, #15596018); M-MLV (Promega, #M1701); Random primers (Invitrogen™,  
921 #48190011); SYBR green master mix (Dongsheng Biotech, #P2092); 4%-20% gradient  
922 SurePAGE gel (GenScript, #M00657); Tris-MOPS-SDS running buffer (GenScript, #M00138);  
923 Biotin-oligo d(T) (Promega, #Z5261, 0.2 μmol/L for mRNA FISH); Diethyl Pyrocarbonate  
924 (DEPC)-treated water (Invitrogen™, #4387937); Paraformaldehyde (Sigma-Aldrich, #158127);  
925 Triton X-100 (Sigma-Aldrich, #X100); BSA (Sigma-Aldrich, #A2153); SSC (Invitrogen™,  
926 #15557044); PBS (Sigma-Aldrich, #P3813); Dithiothreitol (DTT) (Thermo Scientific™,  
927 #R0861); RNase inhibitor (Promega, #N2611); Streptavidin (Invitrogen™, # SA1001, FITC -  
928 conjugated, 1:500 dilution for mRNA FISH); Diamidino-2-phenylindole (DAPI) (Thermo  
929 Scientific, #62247, 1:1000 dilution for IFA); Mounting medium (Sigma-Aldrich, #C9368);  
930 ARS (Sigma-Aldrich, #S7400).

931

### 932 **Plasmid transfection**

933 Transient transfection using Fugene (HD) was described previously [29]. Fugene was used to  
934 transfect all cell lines employed in this study. Briefly, plasmid(s) and Fugene HD (M/V=1:3)  
935 were mixed in Opti-MEM. After incubation for 15 min at room temperature, the mixture was  
936 added to the cultured cells.

937

### 938 **Dual luciferase assay**

939 Plasmids encoding IBV proteins (300 ng) (CMV promoter), human/chicken MDA5 (200 ng)  
940 (CMV promoter) or human/chicken MAVS (200 ng) (SV40 promoter), IFN $\beta$  promoter driven  
941 Firefly luciferase reporter (100 ng) and Renilla luciferase reporter pRL-TK (50 ng) (HSV TK  
942 promoter) were co-transfected into cells in a 24-well plate. To make the different IBV protein  
943 groups more comparable, the plasmids, except those encoding IBV proteins were mixed, and  
944 divided in equal volumes to which the plasmid coding each of the IBV protein was added in.  
945 Each co-transfection group was repeated twice. At 24 h.p.t., cells were lysed using the passive  
946 lysis buffer supplied by the Dual-Luciferase<sup>®</sup> Reporter Assay System (Promega, #E1910).  
947 Measurement of firefly luciferase activity by adding LAR II, and measurement of Renilla  
948 luciferase activity by adding Stop & Glo<sup>®</sup> were performed according to the manufacturer  
949 instructions using a luminometer reading (Cytation 5 imaging multimode reader, Biotek).

950

### 951 **Western blotting analysis**

952 Briefly, cells transfected with plasmids for 24 h were lysed in lysis buffer and the cell lysates  
953 were resolved on 10% SDS-PAGE. To separate IBV-nsp7 (23 kDa), nsp8 (12 kDa), nsp9 (15  
954 kDa), nsp12 (106 kDa), nsp15 (37 kDa) on the same gel, a commercial 4-20% acrylamide  
955 gradient SurePAGE gel was used. Different from SDS-PAGE gel electrophoresis, SurePAGE  
956 gel electrophoresis was performed using 1X Tris-MOPS-SDS running buffer. The proteins  
957 separated by the SDS-PAGE were transferred to a nitrocellulose membrane (GE life Sciences).  
958 The membrane was then incubated for 1 h at room temperature or overnight at 4 °C in blocking  
959 buffer (5% non-fat milk powder diluted in TBST (20 mM Tris, 150 mM NaCl, 0.1% Tween<sup>®</sup>  
960 20 detergent), incubated with primary antibody diluted in blocking buffer, washed three times  
961 in TBST, incubated with HRP-conjugated secondary antibody diluted in blocking buffer, and  
962 again washed three times in TBST. Finally, signal was detected using a Tanon 4600  
963 Chemiluminescent Imaging System (Bio Tanon, China) after development with luminol  
964 chemiluminescence reagent kit (Share-bio, China).

965

### 966 **Puromycin labelling**

967 Puromycin resembles the 3' end of tRNA and binds to growing peptide chains during translation,  
968 causing the stop of protein synthesis and release of premature polypeptides containing  
969 puromycin [78]. Cells were transfected with plasmid for 24 h or infected with IBV for indicated  
970 time, the cells were incubated with 5  $\mu$ g/mL puromycin for 1 h at 37°C. The same amounts of  
971 6 well plate cultured cells were lysed for western blotting analysis, or the cells cultured in 4  
972 well chamber slide were fixed for indirect immunofluorescence assay.

973

#### 974 **Sodium arsenite (ARS) treatment**

975 Cells were seeded in six well culture plates and treated with 1 mM ARS for 30 min before being  
976 collected for mRNA *in situ* hybridization and indirect immunofluorescence analysis.

977

#### 978 **Indirect immunofluorescence assay**

979 Briefly, cells were fixed with 4% paraformaldehyde (diluted in PBS) for 15 min at room  
980 temperature (20-22°C), permeabilized with 0.5% Triton X-100 (diluted in PBS) for 15 min at  
981 room temperature, and incubated in blocking buffer (3% BSA diluted in PBS) for 1 h at 37°C.  
982 Cells were washed with PBS three times (5 min each) at the intervals of above steps on a shaker.  
983 Cells were then incubated with the primary antibody diluted in blocking buffer for 1 h at 37°C,  
984 followed by incubation with FITC- or TRITC-conjugated secondary antibody diluted in  
985 blocking buffer for 1 h at 37°C. In case of double staining, cells were then incubated with the  
986 other unconjugated primary antibody, followed by incubation with the corresponding FITC- or  
987 TRITC-conjugated secondary antibody. At the intervals of each incubation step, cells were  
988 washed three times (5 min each) with PBS buffer containing 0.2% Triton X-100 on a shaker.  
989 DAPI was then applied to stain the nuclei for 7 min at room temperature. Finally, cells were  
990 washed three times with PBS, mounted onto glass slides using prolong gold antifade mountant  
991 (Invitrogen), and examined by Zeiss LSM880 confocal microscope.

992

#### 993 **Indirect immunofluorescence and mRNA fluorescence *in situ* hybridization (FISH)**

994 To combine indirect immunofluorescence and mRNA FISH, cells were fixed for 15 min (4%  
995 paraformaldehyde in DEPC-treated PBS), permeabilized for 15 min (0.5% Triton X-100 in  
996 DEPC-treated PBS), and blocked for 1 h (3% BSA in DEPC-treated PBS), followed with endo-  
997 biotin blocking using a blocking kit (Invitrogen, #E21390) according to the manufacture  
998 instructions [118]. Cells were then incubated for 1 h at 37°C with the primary antibody. In case  
999 of double staining, the other primary antibody was then incubated in the same way. At the  
1000 intervals of each incubation step, cells were washed three times with DEPC-treated PBS  
1001 containing 0.2% Triton X-100. Cells were again fixed with 4% paraformaldehyde and washed  
1002 three times with DEPC-treated PBS. Cells were then equilibrated in 2×SSC (1mg/mL t-RNA ,  
1003 10% detran sulfate and 25% formamide) for 15 min at 42°C, followed by hybridization of  
1004 biotin-oligo d(T) with the poly(A) tail of mRNA for approximately 12 h at 42°C in a humid  
1005 environment. Biotin-oligo d(T) (0.2 μmol/L) were diluted in DEPC-treated PBS containing 0.2%

1006 TritonX-100, 1 mM DTT, and 200 units/ml RNase inhibitor. After the hybridization step,  
1007 samples were washed with 2× SSC for 15 min and then with 0.5× SSC for 15 min, at 42°C on  
1008 a shaker. Cells were again fixed with 4% paraformaldehyde and washed with DEPC-treated  
1009 PBS. Cells were then incubated with Alexa Fluor-conjugated secondary antibodies for 30 min,  
1010 and then with FITC-conjugated streptavidin for 30 min at 37°C. At the intervals of each step,  
1011 cells were washed with DEPC-treated PBS containing 0.2% Triton X-100 three times. DAPI  
1012 was then applied to stain the nuclei for 7 min at room temperature. Cells were washed again  
1013 three times and mounted onto glass slides using mounting reagent. Cells were examined by  
1014 Zeiss LSM880 confocal microscope.

1015

### 1016 ***In vitro* translation**

1017 0.5 µg of PXJ40-IBV-nsp15, 0.5 µg of reporter gene (PXJ40-IBV-N, PXJ40-IBV-M, or T7  
1018 luciferase control DNA), 40 µl TnT® Quick Master Mix (L1170, Promega), 1 µl Methionine  
1019 (1 mM), nuclease-free water (to a final volume of 50 µl) were gently mixed by pipetting. The  
1020 above mixture was then incubated for 90 min at 30°C. Samples of the translation reaction  
1021 products were analysed by Western blot to detect protein expression level, or by luciferase assay  
1022 to detect luciferase activity. For luciferase assay, 2.5 µl of translation reaction products and 50  
1023 µl of Luciferase Assay Reagent (Promega) were mixed by gently pipetting and subjected to  
1024 luminometer reading (Cytation 5 imaging multimode reader, Biotek).

1025

### 1026 **Quantitative RT-PCR analysis**

1027 Total cellular RNAs were extracted using Trizol reagent. cDNAs were synthesized  
1028 using M-MLV reverse transcriptase system. To prime the amplification of mRNAs in case their  
1029 poly(A) tail is cleaved, random primers were used to synthesize cDNAs. The primers for  
1030 quantitative PCR analysis were: for exogenous chicken *MDA5(N)*, 5'-  
1031 AAAACGCAAGGAACGTGTCTG-3' (F) and 5'-GACCGAGGAGAGGGTTAGGG-3' (R);  
1032 for exogenous chicken *MAVS*, 5'-ACATCCTTCCAGCTGTTGGC-3' (F) and 5'-  
1033 CGTAATCTGGAACATCGTATGGG-3'(R); for chicken *β-actin*, 5'-  
1034 CCAGACATCAGGGTGTGATGG-3' (F) and 5'-CTCCATATCATCCCAGTTGGTGA-  
1035 3'(R). The underlined reverse primers target the V5 or HA epitope tag's DNA sequence. In this  
1036 way, mRNA transcribed from the plasmids were specifically amplified.

1037

### 1038 **dsRNA dot blot analysis**

1039 The accumulation of dsRNA was detected via dot blot analysis using an anti-dsRNA J2  
1040 antibody. Briefly, total cellular RNAs were extracted using Trizol reagent. RNA (2 µg) of each  
1041 group was spotted on a Hybond-N+ membrane (GE Healthcare), followed by UV cross-linking  
1042 (120 mJ/cm<sup>2</sup>) using SCIENTZ 03-II (Scientz Biotech). The membrane was then blocked in 5%  
1043 non-fat milk dissolved in DEPC-treated TBS, incubated with mouse anti-dsRNA J2 antibody  
1044 overnight at 4°C or for 1 h at room temperature, followed by incubation with the HRP  
1045 conjugated goat anti-mouse secondary antibody for 1 h at room temperature. At the intervals of  
1046 each incubation step, the membrane was washed three times with washing buffer (0.1%  
1047 Tween® 20 detergent diluted in TBS). The dsRNA signals were detected using Tanon 4600  
1048 Chemiluminescent Imaging System after development with luminol chemiluminescence  
1049 reagent kit.

1050

### 1051 **Polysome profile analysis**

1052 Vero cells were infected with 1 MOI of IBV or rIBV-nsp15-H238A for 16 h, then incubated  
1053 with 100 µg/mL cycloheximide (CHX) (Selleck, Catalog No. S7418) for 15 min at 37°C to  
1054 block translation elongation. Cells were washed and lysed by polysome extraction buffer (20  
1055 mM Tris-HCl pH 7.5, 100 mM KCl, 5 mM MgCl<sub>2</sub>, 0.5% Nonidet P-40) containing 100 µg/mL  
1056 of CHX, protease inhibitors and RNase inhibitors. Lysates were clarified by centrifugation at  
1057 12,000 × g for 15 min at 4°C, and supernatants were resolved on a linear sucrose gradient (7–  
1058 47% in buffer containing 20 mM Tris-Cl, pH 8.0, 140 mM KCl, 1.5 mM MgCl<sub>2</sub>, 1 mM DTT,  
1059 1 mg/mL heparin) by centrifugation at 38,000 × g at 4°C for 3 h. After centrifugation, each 1 ml  
1060 fraction was collected and analysed by Western blot analysis.

1061

### 1062 **Densitometry**

1063 Image J program (NIH, USA) was used to quantify the intensities of corresponding bands of  
1064 western blot, dsRNA dot blot, the intensity of puromycin signal in immunofluorescence image,  
1065 and Pearson's correlation coefficient of signals in immunofluorescence image.

1066

### 1067 **Statistical analysis**

1068 Data and statistical analysis were performed with Graphpad Prism 8 software. Significance was  
1069 determined by ONE-Way ANOVA followed by Tukey's post-hoc test.  $p < 0.05$  was considered  
1070 significant.

1071

1072 **Data availability statement**

1073 All relevant data are within the paper and its Supporting Information files.

1074

1075 **Acknowledgments**

1076 We would like to thank Prof. Dingxiang Liu (South China Agricultural University, China) for  
1077 providing the IBV Beaudette strain and the rabbit anti-IBV-nsp12 polyclonal antibody, and for  
1078 his excellent scientific advice. We also grateful to Prof. Bin Li (Jiangsu Academy of  
1079 Agricultural Sciences, China) for providing TGEV nsp15 cDNA, Prof. Tongling Shan  
1080 (Shanghai Academy of Agricultural Sciences, CAAS) for providing LLC-PK1 and ST cells,  
1081 pDCoV cDNA, Dr. Min Liao (Zhejiang University, China) for providing IBV nsp15  
1082 monoclonal antibody.

1083

1084 **Disclosure**

1085 The authors have no financial conflict of interest.

1086

1087 **Grant support**

1088 This study was supported by the National Key Technologies Research and Development  
1089 Program (No. 2021YFD1801104), the National Natural Science Foundation of China  
1090 (32172834, 31772724).

1091

1092 **Author Contributions**

1093 **Conceptualization:** Ying Liao, Maria Forlenza, Xiaoqian Gong

1094 **Formal analysis:** Ying Liao, Maria Forlenza, Xiaoqian Gong, Edwin Tijhaar, Shanhuan Feng

1095 **Funding acquisition:** Ying Liao, Chan Ding

1096 **Investigation:** Xiaoqian Gong, Shanhuan Feng, Bo Gao, Wenlian Weng, Hongyan Chu,  
1097 Wenxiang Xue, Yanmei Yuan, Yuqiang Cheng

1098 **Project Administration:** Ying Liao, Maria Forlenza

1099 **Resource:** Cuiping Song, Lei Tan, Xusheng Qiu, Chan Ding, Min Liao

1100 **Supervision:** Ying Liao, Maria Forlenza, Shouguo Fang, Chan Ding

1101 **Writing-original draft:** Ying Liao, Maria Forlenza, Xiaoqian Gong, Edwin Tijhaar

1102 **Writing-review & editing:** Ying Liao, Maria Forlenza, Edwin Tijhaar

1103

1104 **Correspondence address**



1105 Address correspondence and reprint requests to: Prof. Ying Liao, Department of Avian Diseases,  
1106 Shanghai Veterinary Research Institute, Chinese Academy of Agricultural Sciences, Shanghai,  
1107 200241. P. R. China; Associate Prof Maria Forlenza, Host-Microbe Interactomics Group,  
1108 Wageningen University and Research, Department of Animal Sciences, the Netherlands.  
1109 Email: [liaoqing@shvri.ac.cn](mailto:liaoqing@shvri.ac.cn); [maria.forlenza@wur.nl](mailto:maria.forlenza@wur.nl)

1110

## 1111 References

- 1112 1. Schütze H. Chapter 20 - Coronaviruses in Aquatic Organisms. In: Kibenge FSB, Godoy MG, editors.  
1113 Aquaculture Virology. San Diego: Academic Press; 2016. p. 327-35.
- 1114 2. Baranov PV, Henderson CM, Anderson CB, Gesteland RF, Atkins JF, Howard MT. Programmed  
1115 ribosomal frameshifting in decoding the SARS-CoV genome. *Virology*. 2005;332(2):498-510. doi:  
1116 10.1016/j.virol.2004.11.038. PubMed PMID: 15680415.
- 1117 3. Ziebuhr J. The coronavirus replicase. *Curr Top Microbiol Immunol*. 2005;287:57-94. Epub 2004/12/22.  
1118 doi: 10.1007/3-540-26765-4\_3. PubMed PMID: 15609509; PubMed Central PMCID: PMCPMC7121973.
- 1119 4. Yuan S, Balaji S, Lomakin IB, Xiong Y. Coronavirus Nsp1: Immune Response Suppression and Protein  
1120 Expression Inhibition. *Front Microbiol*. 2021;12:752214-. doi: 10.3389/fmicb.2021.752214. PubMed PMID:  
1121 34659188.
- 1122 5. Armesto M, Cavanagh D, Britton P. The Replicase Gene of Avian Coronavirus Infectious Bronchitis Virus  
1123 Is a Determinant of Pathogenicity. *PLOS ONE*. 2009;4(10):e7384. doi: 10.1371/journal.pone.0007384.
- 1124 6. Zhang Q, Yoo D. Immune evasion of porcine enteric coronaviruses and viral modulation of antiviral  
1125 innate signaling. *Virus Research*. 2016;226:128-41. doi: <https://doi.org/10.1016/j.virusres.2016.05.015>.
- 1126 7. Minskaia E, Hertzog T, Gorbalenya AE, Campanacci V, Cambillau C, Canard B, et al. Discovery of an  
1127 RNA virus 3'->5' exoribonuclease that is critically involved in coronavirus RNA synthesis. *Proc Natl Acad Sci U S*  
1128 *A*. 2006;103(13):5108-13. Epub 2006/03/22. doi: 10.1073/pnas.0508200103. PubMed PMID: 16549795;  
1129 PubMed Central PMCID: PMCPMC1458802.
- 1130 8. Deng X, Baker SC. An "Old" protein with a new story: Coronavirus endoribonuclease is important for  
1131 evading host antiviral defenses. *Virology*. 2018;517:157-63. doi: 10.1016/j.virol.2017.12.024. PubMed PMID:  
1132 29307596; PubMed Central PMCID: PMCPMC5869138.
- 1133 9. Ivanov KA, Ziebuhr J. Human coronavirus 229E nonstructural protein 13: characterization of duplex-  
1134 unwinding, nucleoside triphosphatase, and RNA 5'-triphosphatase activities. *J Virol*. 2004;78(14):7833-8. Epub  
1135 2004/06/29. doi: 10.1128/JVI.78.14.7833-7838.2004. PubMed PMID: 15220459; PubMed Central PMCID:  
1136 PMCPMC434081.
- 1137 10. Snijder EJ, Decroly E, Ziebuhr J. The Nonstructural Proteins Directing Coronavirus RNA Synthesis and  
1138 Processing. *Adv Virus Res*. 2016;96:59-126. doi: 10.1016/bs.aivir.2016.08.008. PubMed PMID: 27712628.
- 1139 11. Subissi L, Imbert I, Ferron F, Collet A, Coutard B, Decroly E, et al. SARS-CoV ORF1b-encoded  
1140 nonstructural proteins 12-16: replicative enzymes as antiviral targets. *Antiviral Res*. 2014;101:122-30. Epub  
1141 2013/11/26. doi: 10.1016/j.antiviral.2013.11.006. PubMed PMID: 24269475; PubMed Central PMCID:  
1142 PMCPMC7113864.
- 1143 12. Rohaim MA, El Naggar RF, Clayton E, Munir M. Structural and functional insights into non-structural  
1144 proteins of coronaviruses. *Microb Pathog*. 2021;150:104641. Epub 2020/11/27. doi:  
1145 10.1016/j.micpath.2020.104641. PubMed PMID: 33242646; PubMed Central PMCID: PMCPMC7682334.
- 1146 13. Kirchdoerfer RN, Ward AB. Structure of the SARS-CoV nsp12 polymerase bound to nsp7 and nsp8 co-  
1147 factors. *Nature Communications*. 2019;10(1):2342. doi: 10.1038/s41467-019-10280-3.
- 1148 14. Snijder EJ, Bredenbeek PJ, Dobbe JC, Thiel V, Ziebuhr J, Poon LL, et al. Unique and conserved features  
1149 of genome and proteome of SARS-coronavirus, an early split-off from the coronavirus group 2 lineage. *J Mol*  
1150 *Biol*. 2003;331(5):991-1004. doi: 10.1016/s0022-2836(03)00865-9. PubMed PMID: 12927536; PubMed  
1151 Central PMCID: PMCPMC7159028.
- 1152 15. Ivanov KA, Hertzog T, Rozanov M, Bayer S, Thiel V, Gorbalenya AE, et al. Major genetic marker of  
1153 nidoviruses encodes a replicative endoribonuclease. *Proc Natl Acad Sci U S A*. 2004;101(34):12694-9. Epub  
1154 20040810. doi: 10.1073/pnas.0403127101. PubMed PMID: 15304651; PubMed Central PMCID:  
1155 PMCPMC514660.
- 1156 16. Ulferts R, Ziebuhr J. Nidovirus ribonucleases: Structures and functions in viral replication. *RNA Biol*.  
1157 2011;8(2):295-304. Epub 20110301. doi: 10.4161/rna.8.2.15196. PubMed PMID: 21422822.
- 1158 17. Wolff G, Limpens R, Zevenhoven-Dobbe JC, Laugks U, Zheng S, de Jong AWM, et al. A molecular pore  
1159 spans the double membrane of the coronavirus replication organelle. *Science*. 2020;369(6509):1395-8. Epub  
1160 2020/08/09. doi: 10.1126/science.abd3629. PubMed PMID: 32763915; PubMed Central PMCID:  
1161 PMCPMC7665310.
- 1162 18. Strating JR, van Kuppeveld FJ. Viral rewiring of cellular lipid metabolism to create membranous  
1163 replication compartments. *Curr Opin Cell Biol*. 2017;47:24-33. Epub 2017/03/01. doi:  
1164 10.1016/j.ceb.2017.02.005. PubMed PMID: 28242560; PubMed Central PMCID: PMCPMC7127510.
- 1165 19. Knoop K, Kikkert M, Worm SH, Zevenhoven-Dobbe JC, van der Meer Y, Koster AJ, et al. SARS-  
1166 coronavirus replication is supported by a reticulovesicular network of modified endoplasmic reticulum. *PLoS*  
1167 *Biol*. 2008;6(9):e226. Epub 2008/09/19. doi: 10.1371/journal.pbio.0060226. PubMed PMID: 18798692;  
1168 PubMed Central PMCID: PMCPMC2535663.

- 1169 20. Knoop K, Schoehn G, Schaffitzel C. Cryo-electron microscopy of ribosomal complexes in  
1170 cotranslational folding, targeting, and translocation. *Wiley Interdiscip Rev RNA*. 2012;3(3):429-41. Epub  
1171 2011/11/19. doi: 10.1002/wrna.119. PubMed PMID: 22095783.
- 1172 21. Snijder EJ, Limpens R, de Wilde AH, de Jong AWM, Zevenhoven-Dobbe JC, Maier HJ, et al. A unifying  
1173 structural and functional model of the coronavirus replication organelle: Tracking down RNA synthesis. *PLoS*  
1174 *Biol*. 2020;18(6):e3000715. Epub 2020/06/09. doi: 10.1371/journal.pbio.3000715. PubMed PMID: 32511245;  
1175 PubMed Central PMCID: PMCPCMC7302735.
- 1176 22. Maier HJ, Hawes PC, Cottam EM, Mantell J, Verkade P, Monaghan P, et al. Infectious bronchitis virus  
1177 generates spherules from zippered endoplasmic reticulum membranes. *mBio*. 2013;4(5):e00801-13. Epub  
1178 2013/10/24. doi: 10.1128/mBio.00801-13. PubMed PMID: 24149513; PubMed Central PMCID:  
1179 PMCPCMC3812713.
- 1180 23. Oudshoorn D, Rijs K, Limpens R, Groen K, Koster AJ, Snijder EJ, et al. Expression and Cleavage of  
1181 Middle East Respiratory Syndrome Coronavirus nsp3-4 Polyprotein Induce the Formation of Double-Membrane  
1182 Vesicles That Mimic Those Associated with Coronavirus RNA Replication. *mBio*. 2017;8(6). Epub 2017/11/21. doi:  
1183 10.1128/mBio.01658-17. PubMed PMID: 29162711; PubMed Central PMCID: PMCPCMC5698553.
- 1184 24. Angelini MM, Akhlaghpour M, Neuman BW, Buchmeier MJ. Severe acute respiratory syndrome  
1185 coronavirus nonstructural proteins 3, 4, and 6 induce double-membrane vesicles. *mBio*. 2013;4(4). Epub  
1186 2013/08/15. doi: 10.1128/mBio.00524-13. PubMed PMID: 23943763; PubMed Central PMCID:  
1187 PMCPCMC3747587.
- 1188 25. Song J, Liu Y, Gao P, Hu Y, Chai Y, Zhou S, et al. Mapping the Nonstructural Protein Interaction  
1189 Network of Porcine Reproductive and Respiratory Syndrome Virus. *J Virol*. 2018;92(24). Epub 2018/10/05. doi:  
1190 10.1128/JVI.01112-18. PubMed PMID: 30282705; PubMed Central PMCID: PMCPCMC6258939.
- 1191 26. Kindler E, Gil-Cruz C, Spanier J, Li Y, Wilhelm J, Rabouw HH, et al. Early endonuclease-mediated  
1192 evasion of RNA sensing ensures efficient coronavirus replication. *PLoS Pathog*. 2017;13(2):e1006195. doi:  
1193 10.1371/journal.ppat.1006195. PubMed PMID: 28158275; PubMed Central PMCID: PMCPCMC5310923.
- 1194 27. Deng X, Hackbart M, Mettelman RC, O'Brien A, Mielech AM, Yi G, et al. Coronavirus nonstructural  
1195 protein 15 mediates evasion of dsRNA sensors and limits apoptosis in macrophages. *Proc Natl Acad Sci U S A*.  
1196 2017;114(21):E4251-E60. Epub 2017/05/10. doi: 10.1073/pnas.1618310114. PubMed PMID: 28484023;  
1197 PubMed Central PMCID: PMCPCMC5448190.
- 1198 28. Deng X, Geelen Av, Buckley AC, O'Brien A, Pillatzki A, Lager KM, et al. Coronavirus Endoribonuclease  
1199 Activity in Porcine Epidemic Diarrhea Virus Suppresses Type I and Type III Interferon Responses. *Journal of*  
1200 *Virology*. 2019;93(8):e02000-18. doi: doi:10.1128/JVI.02000-18.
- 1201 29. Gao B, Gong X, Fang S, Weng W, Wang H, Chu H, et al. Inhibition of anti-viral stress granule  
1202 formation by coronavirus endoribonuclease nsp15 ensures efficient virus replication. *PLoS Pathog*.  
1203 2021;17(2):e1008690. Epub 2021/02/27. doi: 10.1371/journal.ppat.1008690. PubMed PMID: 33635931;  
1204 PubMed Central PMCID: PMCPCMC7946191.
- 1205 30. Yuen C-K, Lam J-Y, Wong W-M, Mak L-F, Wang X, Chu H, et al. SARS-CoV-2 nsp13, nsp14, nsp15 and  
1206 orf6 function as potent interferon antagonists. *Emerging Microbes & Infections*. 2020;9(1):1418-28. doi:  
1207 10.1080/22221751.2020.1780953.
- 1208 31. Frazier MN, Dillard LB, Krahn JM, Perera L, Williams JG, Wilson IM, et al. Characterization of SARS2  
1209 Nsp15 nuclease activity reveals it's mad about U. *Nucleic Acids Res*. 2021;49(17):10136-49. Epub 2021/08/18.  
1210 doi: 10.1093/nar/gkab719. PubMed PMID: 34403466; PubMed Central PMCID: PMCPCMC8385992.
- 1211 32. Iannello A, Debbeche O, Martin E, Attalah LH, Samarani S, Ahmad A. Viral strategies for evading  
1212 antiviral cellular immune responses of the host. *J Leukoc Biol*. 2006;79(1):16-35. Epub 2005/10/06. doi:  
1213 10.1189/jlb.0705397. PubMed PMID: 16204622.
- 1214 33. Brown DD. Gene expression in eukaryotes. *Oncodev Biol Med*. 1982;4(1-2):9-29. Epub 1982/01/01.  
1215 PubMed PMID: 6757878.
- 1216 34. Yalamanchili P, Weidman K, Dasgupta A. Cleavage of transcriptional activator Oct-1 by poliovirus  
1217 encoded protease 3Cpro. *Virology*. 1997;239(1):176-85. Epub 1998/01/14. doi: 10.1006/viro.1997.8862.  
1218 PubMed PMID: 9426457.
- 1219 35. Sharma R, Raychaudhuri S, Dasgupta A. Nuclear entry of poliovirus protease-polymerase precursor  
1220 3CD: implications for host cell transcription shut-off. *Virology*. 2004;320(2):195-205. Epub 2004/03/16. doi:  
1221 10.1016/j.virol.2003.10.020. PubMed PMID: 15016543.
- 1222 36. De Vlugt C, Sikora D, Pelchat M. Insight into Influenza: A Virus Cap-Snatching. *Viruses*. 2018;10(11).  
1223 Epub 2018/11/21. doi: 10.3390/v10110641. PubMed PMID: 30453478; PubMed Central PMCID:  
1224 PMCPCMC6266781.
- 1225 37. Nemeroff ME, Barabino SM, Li Y, Keller W, Krug RM. Influenza virus NS1 protein interacts with the  
1226 cellular 30 kDa subunit of CPSF and inhibits 3'end formation of cellular pre-mRNAs. *Mol Cell*. 1998;1(7):991-  
1227 1000. Epub 1998/07/04. doi: 10.1016/s1097-2765(00)80099-4. PubMed PMID: 9651582.
- 1228 38. Wang X, Lin L, Yu Y, Yan Y, Ojha NK, Zhou J. The N-terminal residual arginine(19) of influenza A virus  
1229 NS1 protein is required for its nuclear localization and RNA binding. *Vet Microbiol*. 2020;251:108895. Epub  
1230 2020/10/31. doi: 10.1016/j.vetmic.2020.108895. PubMed PMID: 33126184.
- 1231 39. Zhang K, Xie Y, Munoz-Moreno R, Wang J, Zhang L, Esparza M, et al. Structural basis for influenza  
1232 virus NS1 protein block of mRNA nuclear export. *Nat Microbiol*. 2019;4(10):1671-9. Epub 2019/07/03. doi:  
1233 10.1038/s41564-019-0482-x. PubMed PMID: 31263181; PubMed Central PMCID: PMCPCMC6754785.
- 1234 40. Kuramitsu M, Hashizume C, Yamamoto N, Azuma A, Kamata M, Yamamoto N, et al. A novel role for  
1235 Vpr of human immunodeficiency virus type 1 as a regulator of the splicing of cellular pre-mRNA. *Microbes and*  
1236 *Infection*. 2005;7(9):1150-60. doi: <https://doi.org/10.1016/j.micinf.2005.03.022>.
- 1237 41. Wang X, Hennig T, Whisnant AW, Erhard F, Prusty BK, Friedel CC, et al. Herpes simplex virus blocks  
1238 host transcription termination via the bimodal activities of ICP27. *Nat Commun*. 2020;11(1):293. Epub  
1239 2020/01/17. doi: 10.1038/s41467-019-14109-x. PubMed PMID: 31941886; PubMed Central PMCID:  
1240 PMCPCMC6962326.

- 1241 42. Castelló A, Izquierdo JM, Welnowska E, Carrasco L. RNA nuclear export is blocked by poliovirus 2A  
1242 protease and is concomitant with nucleoporin cleavage. *J Cell Sci.* 2009;122(Pt 20):3799-809. Epub  
1243 2009/10/01. doi: 10.1242/jcs.055988. PubMed PMID: 19789179.
- 1244 43. Kuyumcu-Martinez NM, Van Eden ME, Younan P, Lloyd RE. Cleavage of poly(A)-binding protein by  
1245 poliovirus 3C protease inhibits host cell translation: a novel mechanism for host translation shutoff. *Mol Cell*  
1246 *Biol.* 2004;24(4):1779-90. Epub 2004/01/30. doi: 10.1128/mcb.24.4.1779-1790.2004. PubMed PMID:  
1247 14749392; PubMed Central PMCID: PMCPC344173.
- 1248 44. Kamitani W, Huang C, Narayanan K, Lokugamage KG, Makino S. A two-pronged strategy to suppress  
1249 host protein synthesis by SARS coronavirus Nsp1 protein. *Nat Struct Mol Biol.* 2009;16(11):1134-40. Epub  
1250 20091018. doi: 10.1038/nsmb.1680. PubMed PMID: 19838190; PubMed Central PMCID: PMCPC2784181.
- 1251 45. Zhang K, Miorin L, Makio T, Dehghan I, Gao S, Xie Y, et al. Nsp1 protein of SARS-CoV-2 disrupts the  
1252 mRNA export machinery to inhibit host gene expression. *Sci Adv.* 2021;7(6). Epub 2021/02/07. doi:  
1253 10.1126/sciadv.abe7386. PubMed PMID: 33547084; PubMed Central PMCID: PMCPC7864571.
- 1254 46. Gomez GN, Abrar F, Dodhia MP, Gonzalez FG, Nag A. SARS coronavirus protein nsp1 disrupts  
1255 localization of Nup93 from the nuclear pore complex. *Biochem Cell Biol.* 2019;97(6):758-66. Epub 20190403.  
1256 doi: 10.1139/bcb-2018-0394. PubMed PMID: 30943371.
- 1257 47. Kamitani W, Narayanan K, Huang C, Lokugamage K, Ikegami T, Ito N, et al. Severe acute respiratory  
1258 syndrome coronavirus nsp1 protein suppresses host gene expression by promoting host mRNA degradation.  
1259 *Proc Natl Acad Sci U S A.* 2006;103(34):12885-90. Epub 2006/08/17. doi: 10.1073/pnas.0603144103. PubMed  
1260 PMID: 16912115; PubMed Central PMCID: PMCPC1568942.
- 1261 48. Lokugamage KG, Narayanan K, Nakagawa K, Terasaki K, Ramirez SI, Tseng CT, et al. Middle East  
1262 Respiratory Syndrome Coronavirus nsp1 Inhibits Host Gene Expression by Selectively Targeting mRNAs  
1263 Transcribed in the Nucleus while Sparing mRNAs of Cytoplasmic Origin. *J Virol.* 2015;89(21):10970-81. Epub  
1264 20150826. doi: 10.1128/JVI.01352-15. PubMed PMID: 26311885; PubMed Central PMCID: PMCPC4621111.
- 1265 49. Nakagawa K, Narayanan K, Wada M, Popov VL, Cajimat M, Baric RS, et al. The Endonucleolytic RNA  
1266 Cleavage Function of nsp1 of Middle East Respiratory Syndrome Coronavirus Promotes the Production of  
1267 Infectious Virus Particles in Specific Human Cell Lines. *J Virol.* 2018;92(21). Epub 20181012. doi:  
1268 10.1128/JVI.01157-18. PubMed PMID: 30111568; PubMed Central PMCID: PMCPC6189501.
- 1269 50. Huang C, Lokugamage KG, Rozovics JM, Narayanan K, Semler BL, Makino S. SARS coronavirus nsp1  
1270 protein induces template-dependent endonucleolytic cleavage of mRNAs: viral mRNAs are resistant to nsp1-  
1271 induced RNA cleavage. *PLoS Pathog.* 2011;7(12):e1002433. Epub 2011/12/17. doi:  
1272 10.1371/journal.ppat.1002433. PubMed PMID: 22174690; PubMed Central PMCID: PMCPC3234236.
- 1273 51. Schubert K, Karousis ED, Jomaa A, Scaiola A, Echeverria B, Gurzeler LA, et al. SARS-CoV-2 Nsp1 binds  
1274 the ribosomal mRNA channel to inhibit translation. *Nat Struct Mol Biol.* 2020;27(10):959-66. Epub 2020/09/11.  
1275 doi: 10.1038/s41594-020-0511-8. PubMed PMID: 32908316.
- 1276 52. Tidu A, Janvier A, Schaeffer L, Sosnowski P, Kuhn L, Hammann P, et al. The viral protein NSP1 acts as  
1277 a ribosome gatekeeper for shutting down host translation and fostering SARS-CoV-2 translation. *RNA.*  
1278 2020;27(3):253-64. Epub 2020/12/04. doi: 10.1261/rna.078121.120. PubMed PMID: 33268501; PubMed  
1279 Central PMCID: PMCPC7901841.
- 1280 53. Kint J, Langereis MA, Maier HJ, Britton P, van Kuppeveld FJ, Koumans J, et al. Infectious Bronchitis  
1281 Coronavirus Limits Interferon Production by Inducing a Host Shutoff That Requires Accessory Protein 5b.  
1282 *Journal of Virology.* 2016;90(16):7519-28. doi: 10.1128/jvi.00627-16.
- 1283 54. Kint J, Fernandez-Gutierrez M, Maier HJ, Britton P, Langereis MA, Koumans J, et al. Activation of the  
1284 chicken type I interferon response by infectious bronchitis coronavirus. *J Virol.* 2015;89(2):1156-67. doi:  
1285 10.1128/JVI.02671-14. PubMed PMID: 25378498; PubMed Central PMCID: PMCPC4300645.
- 1286 55. Kint J, Dickhout A, Kutter J, Maier HJ, Britton P, Koumans J, et al. Infectious Bronchitis Coronavirus  
1287 Inhibits STAT1 Signaling and Requires Accessory Proteins for Resistance to Type I Interferon Activity. *J Virol.*  
1288 2015;89(23):12047-57. Epub 20150923. doi: 10.1128/JVI.01057-15. PubMed PMID: 26401035; PubMed  
1289 Central PMCID: PMCPC4645315.
- 1290 56. Xiao H, Xu LH, Yamada Y, Liu DX. Coronavirus spike protein inhibits host cell translation by interaction  
1291 with eIF3f. *PLoS One.* 2008;3(1):e1494. Epub 2008/01/31. doi: 10.1371/journal.pone.0001494. PubMed PMID:  
1292 18231581; PubMed Central PMCID: PMCPC2204050.
- 1293 57. Kint J, Langereis MA, Maier HJ, Britton P, van Kuppeveld FJ, Koumans J, et al. Infectious Bronchitis  
1294 Coronavirus Limits Interferon Production by Inducing a Host Shutoff That Requires Accessory Protein 5b. *J Virol.*  
1295 2016;90(16):7519-28. Epub 2016/06/10. doi: 10.1128/JVI.00627-16. PubMed PMID: 27279618; PubMed  
1296 Central PMCID: PMCPC4984617.
- 1297 58. Shiflett LA, Read GS. mRNA decay during herpes simplex virus (HSV) infections: mutations that affect  
1298 translation of an mRNA influence the sites at which it is cleaved by the HSV virion host shutoff (Vhs) protein. *J*  
1299 *Virol.* 2013;87(1):94-109. Epub 20121017. doi: 10.1128/JVI.01557-12. PubMed PMID: 23077305; PubMed  
1300 Central PMCID: PMCPC3536374.
- 1301 59. Saffran HA, Read GS, Smiley JR. Evidence for translational regulation by the herpes simplex virus  
1302 virion host shutoff protein. *J Virol.* 2010;84(12):6041-9. Epub 20100331. doi: 10.1128/JVI.01819-09. PubMed  
1303 PMID: 20357089; PubMed Central PMCID: PMCPC2876651.
- 1304 60. Feng P, Everly DN, Jr., Read GS. mRNA decay during herpes simplex virus (HSV) infections: protein-  
1305 protein interactions involving the HSV virion host shutoff protein and translation factors eIF4H and eIF4A. *J*  
1306 *Virol.* 2005;79(15):9651-64. doi: 10.1128/JVI.79.15.9651-9664.2005. PubMed PMID: 16014927; PubMed  
1307 Central PMCID: PMCPC1181552.
- 1308 61. Covarrubias S, Richner JM, Clyde K, Lee YJ, Glaunsinger BA. Host shutoff is a conserved phenotype of  
1309 gammaherpesvirus infection and is orchestrated exclusively from the cytoplasm. *J Virol.* 2009;83(18):9554-66.  
1310 Epub 20090708. doi: 10.1128/JVI.01051-09. PubMed PMID: 19587049; PubMed Central PMCID:  
1311 PMCPC2738246.

- 1312 62. Lee YJ, Glaunsinger BA. Aberrant herpesvirus-induced polyadenylation correlates with cellular  
1313 messenger RNA destruction. *PLoS Biol.* 2009;7(5):e1000107. Epub 20090526. doi:  
1314 10.1371/journal.pbio.1000107. PubMed PMID: 19468299; PubMed Central PMCID: PMCPMC2680333.
- 1315 63. Glaunsinger B, Chavez L, Ganem D. The exonuclease and host shutoff functions of the SOX protein of  
1316 Kaposi's sarcoma-associated herpesvirus are genetically separable. *J Virol.* 2005;79(12):7396-401. Epub  
1317 2005/05/28. doi: 10.1128/JVI.79.12.7396-7401.2005. PubMed PMID: 15919895; PubMed Central PMCID:  
1318 PMCPMC1143623.
- 1319 64. Horst D, Burmeister WP, Boer IG, van Leeuwen D, Buisson M, Gorbalenya AE, et al. The "Bridge" in the  
1320 Epstein-Barr virus alkaline exonuclease protein BGLF5 contributes to shutoff activity during productive infection.  
1321 *J Virol.* 2012;86(17):9175-87. Epub 2012/06/15. doi: 10.1128/JVI.00309-12. PubMed PMID: 22696660;  
1322 PubMed Central PMCID: PMCPMC3416140.
- 1323 65. Clyde K, Glaunsinger BA. Deep sequencing reveals direct targets of gammaherpesvirus-induced mRNA  
1324 decay and suggests that multiple mechanisms govern cellular transcript escape. *PLoS One.* 2011;6(5):e19655.  
1325 Epub 2011/05/17. doi: 10.1371/journal.pone.0019655. PubMed PMID: 21573023; PubMed Central PMCID:  
1326 PMCPMC3090416.
- 1327 66. Rowe M, Glaunsinger B, van Leeuwen D, Zuo J, Sweetman D, Ganem D, et al. Host shutoff during  
1328 productive Epstein-Barr virus infection is mediated by BGLF5 and may contribute to immune evasion. *Proc Natl*  
1329 *Acad Sci U S A.* 2007;104(9):3366-71. Epub 2007/03/16. doi: 10.1073/pnas.0611128104. PubMed PMID:  
1330 17360652; PubMed Central PMCID: PMCPMC1805610.
- 1331 67. Pardamean CI, Wu TT. Inhibition of Host Gene Expression by KSHV: Sabotaging mRNA Stability and  
1332 Nuclear Export. *Front Cell Infect Microbiol.* 2021;11:648055. Epub 2021/04/27. doi:  
1333 10.3389/fcimb.2021.648055. PubMed PMID: 33898329; PubMed Central PMCID: PMCPMC8062738.
- 1334 68. Gaglia MM, Covarrubias S, Wong W, Glaunsinger BA. A common strategy for host RNA degradation by  
1335 divergent viruses. *J Virol.* 2012;86(17):9527-30. Epub 20120627. doi: 10.1128/JVI.01230-12. PubMed PMID:  
1336 22740404; PubMed Central PMCID: PMCPMC3416159.
- 1337 69. Covarrubias S, Gaglia MM, Kumar GR, Wong W, Jackson AO, Glaunsinger BA. Coordinated destruction  
1338 of cellular messages in translation complexes by the gammaherpesvirus host shutoff factor and the mammalian  
1339 exonuclease Xrn1. *PLoS Pathog.* 2011;7(10):e1002339. Epub 20111027. doi: 10.1371/journal.ppat.1002339.  
1340 PubMed PMID: 22046136; PubMed Central PMCID: PMCPMC3203186.
- 1341 70. Levene RE, Gaglia MM. Host Shutoff in Influenza A Virus: Many Means to an End. *Viruses.* 2018;10(9).  
1342 Epub 20180905. doi: 10.3390/v10090475. PubMed PMID: 30189604; PubMed Central PMCID:  
1343 PMCPMC6165434.
- 1344 71. Klumpp K, Hooker L, Handa B. [37] - Influenza Virus Endoribonuclease. In: Nicholson AW, editor.  
1345 *Methods in Enzymology.* 342: Academic Press; 2001. p. 451-66.
- 1346 72. Jagger BW, Wise HM, Kash JC, Walters KA, Wills NM, Xiao YL, et al. An overlapping protein-coding  
1347 region in influenza A virus segment 3 modulates the host response. *Science.* 2012;337(6091):199-204. Epub  
1348 20120628. doi: 10.1126/science.1222213. PubMed PMID: 22745253; PubMed Central PMCID:  
1349 PMCPMC3552242.
- 1350 73. Khapersky DA, Schmalings S, Larkins-Ford J, McCormick C, Gaglia MM. Selective Degradation of Host  
1351 RNA Polymerase II Transcripts by Influenza A Virus PA-X Host Shutoff Protein. *PLoS Pathog.*  
1352 2016;12(2):e1005427. Epub 20160205. doi: 10.1371/journal.ppat.1005427. PubMed PMID: 26849127;  
1353 PubMed Central PMCID: PMCPMC4744033.
- 1354 74. Gaucherand L, Porter BK, Levene RE, Price EL, Schmalings SK, Rycroft CH, et al. The Influenza A Virus  
1355 Endoribonuclease PA-X Usurps Host mRNA Processing Machinery to Limit Host Gene Expression. *Cell Rep.*  
1356 2019;27(3):776-92 e7. doi: 10.1016/j.celrep.2019.03.063. PubMed PMID: 30995476; PubMed Central PMCID:  
1357 PMCPMC6499400.
- 1358 75. Lee SB, Park YH, Chungu K, Woo SJ, Han ST, Choi HJ, et al. Targeted Knockout of MDA5 and TLR3 in  
1359 the DF-1 Chicken Fibroblast Cell Line Impairs Innate Immune Response Against RNA Ligands. *Frontiers in*  
1360 *Immunology.* 2020;11(678). doi: 10.3389/fimmu.2020.00678.
- 1361 76. Karpala AJ, Stewart C, McKay J, Lowenthal JW, Bean AGD. Characterization of Chicken Mda5 Activity:  
1362 Regulation of IFN- $\beta$  in the Absence of RIG-I Functionality. *The Journal of Immunology.* 2011;186(9):5397-405.  
1363 doi: 10.4049/jimmunol.1003712.
- 1364 77. Cheng Y, Zhu W, Ding C, Niu Q, Wang H, Yan Y, et al. IRF7 Is Involved in Both STING and MAVS  
1365 Mediating IFN- $\beta$  Signaling in IRF3-Lacking Chickens. *The Journal of Immunology.* 2019;ji1900293. doi:  
1366 10.4049/jimmunol.1900293.
- 1367 78. Starck SR, Green HM, Alberola-Ila J, Roberts RW. A general approach to detect protein expression in  
1368 vivo using fluorescent puromycin conjugates. *Chem Biol.* 2004;11(7):999-1008. Epub 2004/07/24. doi:  
1369 10.1016/j.chembiol.2004.05.011. PubMed PMID: 15271358.
- 1370 79. Afonina E, Stauber R, Pavlakis GN. The human poly(A)-binding protein 1 shuttles between the nucleus  
1371 and the cytoplasm. *J Biol Chem.* 1998;273(21):13015-21. Epub 1998/05/28. doi: 10.1074/jbc.273.21.13015.  
1372 PubMed PMID: 9582337.
- 1373 80. Gray NK, Hrabalkova L, Scanlon JP, Smith RW. Poly(A)-binding proteins and mRNA localization: who  
1374 rules the roost? *Biochem Soc Trans.* 2015;43(6):1277-84. Epub 2015/11/29. doi: 10.1042/BST20150171.  
1375 PubMed PMID: 26614673.
- 1376 81. Hosoda N, Lejeune F, Maquat LE. Evidence that poly(A) binding protein C1 binds nuclear pre-mRNA  
1377 poly(A) tails. *Mol Cell Biol.* 2006;26(8):3085-97. Epub 2006/04/04. doi: 10.1128/MCB.26.8.3085-3097.2006.  
1378 PubMed PMID: 16581783; PubMed Central PMCID: PMCPMC1446973.
- 1379 82. Wang X, Liao Y, Yap PL, Png KJ, Tam JP, Liu DX. Inhibition of protein kinase R activation and  
1380 upregulation of GADD34 expression play a synergistic role in facilitating coronavirus replication by maintaining  
1381 de novo protein synthesis in virus-infected cells. *J Virol.* 2009;83(23):12462-72. Epub 2009/09/25. doi:  
1382 10.1128/JVI.01546-09. PubMed PMID: 19776135; PubMed Central PMCID: PMCPMC2786722.

- 1383 83. He T, Wang M, Cheng A, Yang Q, Wu Y, Jia R, et al. Host shutoff activity of VHS and SOX-like proteins:  
1384 role in viral survival and immune evasion. *Virology*. 2020;17(1):68. Epub 2020/05/21. doi: 10.1186/s12985-020-  
1385 01336-8. PubMed PMID: 32430029; PubMed Central PMCID: PMCPCMC7235440.
- 1386 84. Hayashi T, Chaimayo C, McGuinness J, Takimoto T. Critical Role of the PA-X C-Terminal Domain of  
1387 Influenza A Virus in Its Subcellular Localization and Shutoff Activity. *J Virol*. 2016;90(16):7131-41. Epub  
1388 2016/05/27. doi: 10.1128/JVI.00954-16. PubMed PMID: 27226377; PubMed Central PMCID: PMCPCMC4984632.
- 1389 85. Daly R, Khapersky DA, Gaglia MM. Fine-tuning a blunt tool: Regulation of viral host shutoff RNases.  
1390 *PLoS Pathog*. 2020;16(4):e1008385. Epub 2020/04/09. doi: 10.1371/journal.ppat.1008385. PubMed PMID:  
1391 32267905; PubMed Central PMCID: PMCPCMC7141626.
- 1392 86. Hackbart M, Deng X, Baker SC. Coronavirus endoribonuclease targets viral polyuridine sequences to  
1393 evade activating host sensors. *Proc Natl Acad Sci U S A*. 2020;117(14):8094-103. Epub 2020/03/22. doi:  
1394 10.1073/pnas.1921485117. PubMed PMID: 32198201; PubMed Central PMCID: PMCPCMC7149396.
- 1395 87. Gingold H, Pilpel Y. Determinants of translation efficiency and accuracy. *Mol Syst Biol*. 2011;7:481.  
1396 Epub 2011/04/14. doi: 10.1038/msb.2011.14. PubMed PMID: 21487400; PubMed Central PMCID:  
1397 PMCPCMC3101949.
- 1398 88. Blobel G. A protein of molecular weight 78,000 bound to the polyadenylate region of eukaryotic  
1399 messenger RNAs. *Proc Natl Acad Sci U S A*. 1973;70(3):924-8. Epub 1973/03/01. doi: 10.1073/pnas.70.3.924.  
1400 PubMed PMID: 4515002; PubMed Central PMCID: PMCPCMC433389.
- 1401 89. Safaee N, Kozlov G, Noronha AM, Xie J, Wilds CJ, Gehring K. Interdomain allostery promotes assembly  
1402 of the poly(A) mRNA complex with PABP and eIF4G. *Mol Cell*. 2012;48(3):375-86. Epub 2012/10/09. doi:  
1403 10.1016/j.molcel.2012.09.001. PubMed PMID: 23041282.
- 1404 90. Sonenberg N, Hinnebusch AG. Regulation of translation initiation in eukaryotes: mechanisms and  
1405 biological targets. *Cell*. 2009;136(4):731-45. Epub 2009/02/26. doi: 10.1016/j.cell.2009.01.042. PubMed  
1406 PMID: 19239892; PubMed Central PMCID: PMCPCMC3610329.
- 1407 91. Jain S, Wheeler JR, Walters RW, Agrawal A, Barsic A, Parker R. ATPase-Modulated Stress Granules  
1408 Contain a Diverse Proteome and Substructure. *Cell*. 2016;164(3):487-98. Epub 2016/01/14. doi:  
1409 10.1016/j.cell.2015.12.038. PubMed PMID: 26777405.
- 1410 92. Buchan JR, Parker R. Eukaryotic stress granules: the ins and outs of translation. *Mol Cell*.  
1411 2009;36(6):932-41. Epub 2010/01/13. doi: 10.1016/j.molcel.2009.11.020. PubMed PMID: 20064460; PubMed  
1412 Central PMCID: PMCPCMC2813218.
- 1413 93. Smith RW, Gray NK. Poly(A)-binding protein (PABP): a common viral target. *Biochem J*.  
1414 2010;426(1):1-12. Epub 2010/01/28. doi: 10.1042/BJ20091571. PubMed PMID: 20102337.
- 1415 94. Kumar GR, Glaunsinger BA. Nuclear import of cytoplasmic poly(A) binding protein restricts gene  
1416 expression via hyperadenylation and nuclear retention of mRNA. *Mol Cell Biol*. 2010;30(21):4996-5008. Epub  
1417 2010/09/09. doi: 10.1128/MCB.00600-10. PubMed PMID: 20823266; PubMed Central PMCID:  
1418 PMCPCMC2953054.
- 1419 95. Kumar GR, Shum L, Glaunsinger BA. Importin alpha-mediated nuclear import of cytoplasmic poly(A)  
1420 binding protein occurs as a direct consequence of cytoplasmic mRNA depletion. *Molecular and cellular biology*.  
1421 2011;31(15):3113-25. Epub 2011/06/06. doi: 10.1128/MCB.05402-11. PubMed PMID: 21646427.
- 1422 96. Shi ST, Lai MM. Viral and cellular proteins involved in coronavirus replication. *Curr Top Microbiol*  
1423 *Immunol*. 2005;287:95-131. doi: 10.1007/3-540-26765-4\_4. PubMed PMID: 15609510; PubMed Central  
1424 PMCID: PMCPCMC7121242.
- 1425 97. Burgess HM, Richardson WA, Anderson RC, Salaun C, Graham SV, Gray NK. Nuclear relocalisation of  
1426 cytoplasmic poly(A)-binding proteins PABP1 and PABP4 in response to UV irradiation reveals mRNA-dependent  
1427 export of metazoan PABPs. *J Cell Sci*. 2011;124(Pt 19):3344-55. doi: 10.1242/jcs.087692. PubMed PMID:  
1428 21940797; PubMed Central PMCID: PMCPCMC3178455.
- 1429 98. Wylie KM, Schrimpf JE, Morrison LA. Increased eIF2alpha phosphorylation attenuates replication of  
1430 herpes simplex virus 2 vhs mutants in mouse embryonic fibroblasts and correlates with reduced accumulation  
1431 of the PKR antagonist ICP34.5. *J Virol*. 2009;83(18):9151-62. Epub 2009/07/10. doi: 10.1128/jvi.00886-09.  
1432 PubMed PMID: 19587046; PubMed Central PMCID: PMCPCMC2738226.
- 1433 99. Eiermann N, Haneke K, Sun Z, Stoeklin G, Ruggieri A. Dance with the Devil: Stress Granules and  
1434 Signaling in Antiviral Responses. *Viruses*. 2020;12(9):984. doi: 10.3390/v12090984. PubMed PMID: 32899736.
- 1435 100. Athmer J, Fehr AR, Grunewald M, Smith EC, Denison MR, Perlman S. In Situ Tagged nsp15 Reveals  
1436 Interactions with Coronavirus Replication/Transcription Complex-Associated Proteins. *mBio*. 2017;8(1). Epub  
1437 20170131. doi: 10.1128/mBio.02320-16. PubMed PMID: 28143984; PubMed Central PMCID: PMCPCMC5285509.
- 1438 101. Wilamowski M, Hammel M, Leite W, Zhang Q, Kim Y, Weiss K, et al. Transient complexes of the Nsp7,  
1439 Nsp8 and Nsp12 in SARS-CoV-2 replication transcription complex. *Biophys J*. 2021. Epub 2021/07/02. doi:  
1440 10.1016/j.bpj.2021.06.006. PubMed PMID: 34197805; PubMed Central PMCID: PMCPCMC8238635.
- 1441 102. Gosert R, Kanjanahaluethai A, Egger D, Bienz K, Baker SC. RNA replication of mouse hepatitis virus  
1442 takes place at double-membrane vesicles. *J Virol*. 2002;76(8):3697-708. doi: 10.1128/jvi.76.8.3697-  
1443 3708.2002. PubMed PMID: 11907209; PubMed Central PMCID: PMCPCMC136101.
- 1444 103. Mohan J, Wollert T. Membrane remodeling by SARS-CoV-2 - double-enveloped viral replication. *Fac*  
1445 *Rev*. 2021;10:17. Epub 20210222. doi: 10.12703/r/10-17. PubMed PMID: 33718934; PubMed Central PMCID:  
1446 PMCPCMC7946385.
- 1447 104. Roingard P, Eymieux S, Burlaud-Gaillard J, Hourieux C, Patient R, Blanchard E. The double-membrane  
1448 vesicle (DMV): a virus-induced organelle dedicated to the replication of SARS-CoV-2 and other positive-sense  
1449 single-stranded RNA viruses. *Cell Mol Life Sci*. 2022;79(8):425. Epub 20220716. doi: 10.1007/s00018-022-  
1450 04469-x. PubMed PMID: 35841484; PubMed Central PMCID: PMCPCMC9287701.
- 1451 105. Knoops K, Schoehn G, Schaffitzel C. Cryo-electron microscopy of ribosomal complexes in  
1452 cotranslational folding, targeting, and translocation. *Wiley Interdiscip Rev RNA*. 2012;3(3):429-41. doi:  
1453 10.1002/wrna.119. PubMed PMID: 22095783.

- 1454 106. Stueckemann JA, Holth M, Swart WJ, Kowalchuk K, Smith MS, Wolstenholme AJ, et al. Replication of  
1455 lactate dehydrogenase-elevating virus in macrophages. 2. Mechanism of persistent infection in mice and cell  
1456 culture. *J Gen Virol.* 1982;59(Pt 2):263-72. PubMed PMID: 6176676.
- 1457 107. Wood O, Tauraso N, Liebhaber H. Electron microscopic study of tissue cultures infected with simian  
1458 haemorrhagic fever virus. *J Gen Virol.* 1970;7(2):129-36. PubMed PMID: 4987738.
- 1459 108. Wolff G, Limpens RWAL, Zevenhoven-Dobbe JC, Laugks U, Zheng S, de Jong AWM, et al. A molecular  
1460 pore spans the double membrane of the coronavirus replication organelle. *Science (New York, NY).*  
1461 2020;369(6509):1395-8. doi: 10.1126/science.abd3629. PubMed PMID: 32763915.
- 1462 109. Shen Z, Wang G, Yang Y, Shi J, Fang L, Li F, et al. A conserved region of nonstructural protein 1 from  
1463 alphacoronaviruses inhibits host gene expression and is critical for viral virulence. *J Biol Chem.*  
1464 2019;294(37):13606-18. Epub 20190726. doi: 10.1074/jbc.RA119.009713. PubMed PMID: 31350335; PubMed  
1465 Central PMCID: PMC6746460.
- 1466 110. Schubert K, Karousis ED, Jomaa A, Scaiola A, Echeverria B, Gurzeler LA, et al. Author Correction:  
1467 SARS-CoV-2 Nsp1 binds the ribosomal mRNA channel to inhibit translation. *Nat Struct Mol Biol.*  
1468 2020;27(11):1094. doi: 10.1038/s41594-020-00533-x. PubMed PMID: 33082564; PubMed Central PMCID:  
1469 PMC6754671.
- 1470 111. Thoms M, Buschauer R, Ameismeier M, Koepke L, Denk T, Hirschenberger M, et al. Structural basis for  
1471 translational shutdown and immune evasion by the Nsp1 protein of SARS-CoV-2. *Science.*  
1472 2020;369(6508):1249-55. Epub 20200717. doi: 10.1126/science.abc8665. PubMed PMID: 32680882; PubMed  
1473 Central PMCID: PMC67402621.
- 1474 112. Banerjee AK, Blanco MR, Bruce EA, Honson DD, Chen LM, Chow A, et al. SARS-CoV-2 Disrupts  
1475 Splicing, Translation, and Protein Trafficking to Suppress Host Defenses. *Cell.* 2020;183(5):1325-39 e21. Epub  
1476 20201008. doi: 10.1016/j.cell.2020.10.004. PubMed PMID: 33080218; PubMed Central PMCID:  
1477 PMC67543886.
- 1478 113. Hsu JC, Laurent-Rolle M, Pawlak JB, Wilen CB, Cresswell P. Translational shutdown and evasion of the  
1479 innate immune response by SARS-CoV-2 NSP14 protein. *Proc Natl Acad Sci U S A.* 2021;118(24). Epub  
1480 2021/05/29. doi: 10.1073/pnas.2101161118. PubMed PMID: 34045361; PubMed Central PMCID:  
1481 PMC68214666.
- 1482 114. Fang SG, Shen S, Tay FP, Liu DX. Selection of and recombination between minor variants lead to the  
1483 adaptation of an avian coronavirus to primate cells. *Biochem Biophys Res Commun.* 2005;336(2):417-23. Epub  
1484 2005/09/03. doi: 10.1016/j.bbrc.2005.08.105. PubMed PMID: 16137658; PubMed Central PMCID:  
1485 PMC67092901.
- 1486 115. Tay FPL, Huang M, Wang L, Yamada Y, Liu DX. Characterization of cellular furin content as a potential  
1487 factor determining the susceptibility of cultured human and animal cells to coronavirus infectious bronchitis  
1488 virus infection. *Virology.* 2012;433(2):421-30. Epub 2012/09/18. doi: 10.1016/j.virol.2012.08.037. PubMed  
1489 PMID: 22995191.
- 1490 116. Fang S, Chen B, Tay FP, Ng BS, Liu DX. An arginine-to-proline mutation in a domain with undefined  
1491 functions within the helicase protein (Nsp13) is lethal to the coronavirus infectious bronchitis virus in cultured  
1492 cells. *Virology.* 2007;358(1):136-47. Epub 2006/09/19. doi: 10.1016/j.virol.2006.08.020. PubMed PMID:  
1493 16979681; PubMed Central PMCID: PMC67111978.
- 1494 117. Cheng Y, Sun Y, Wang H, Yan Y, Ding C, Sun J. Chicken STING Mediates Activation of the IFN Gene  
1495 Independently of the RIG-I Gene. *J Immunol.* 2015;195(8):3922-36. Epub 20150921. doi:  
1496 10.4049/jimmunol.1500638. PubMed PMID: 26392466.
- 1497 118. Piketty ML, Polak M, Flechtner I, Gonzales-Briceño L, Souberbielle JC. False biochemical diagnosis of  
1498 hyperthyroidism in streptavidin-biotin-based immunoassays: the problem of biotin intake and related  
1499 interferences. *Clin Chem Lab Med.* 2017;55(6):780-8. Epub 2016/10/13. doi: 10.1515/cclm-2016-0606.  
1500 PubMed PMID: 27732554.

1501
